1 **Ecological success of sexual and asexual reproductive**  
2 **strategies invading an environmentally unstable**  
3 **habitat**

4 Willian T.A.F. Silva<sup>1,2,\*</sup>, Anna Nyqvist<sup>1</sup>, Per R. Jonsson<sup>3</sup>, and Karin C. Harding<sup>1</sup>

5 <sup>1</sup>Department of Biological and Environmental Sciences, University of Gothenburg,  
6 Medicinargatan 18, SE-413 90 Gothenburg, Sweden.

7 <sup>2</sup>Gothenburg Global Biodiversity Centre, Gothenburg, Sweden.

8 <sup>3</sup>Department of Marine Sciences, Tjärnö Marine Laboratory, University of Gothenburg,  
9 SE-452 96 Strömstad, Sweden.

10 <sup>\*</sup>Corresponding author: [willian.silva@evobiolab.com](mailto:willian.silva@evobiolab.com) (WTAFS).

11 Running title: Sexual vs. asexual reproduction in a metapopulation.

12 Key words: metapopulation, geographic parthenogenesis, parthenogenesis, automictic,  
13 apomictic, invasion, population dynamics.

14

## Abstract

15

16

17

18

19

20

21

22

23

24

25

26

27

28

29

Many aspects of sexual and asexual reproduction have been studied empirically and theoretically. The differences between sexual and asexual reproduction within a species often lead to a biased geographical distribution of individuals with different reproductive strategies. While sexuals are more abundant in the core habitat, asexuals are often found in marginal habitats along the edge of the species distribution. This pattern, called geographic parthenogenesis, has been observed in many species but the mechanisms responsible for generating it are poorly known. We used a quantitative approach using a metapopulation model to explore the ecological processes that can lead to geographic parthenogenesis and the invasion of new habitats by different reproductive strategies. We analyzed the Allee effect on sexual populations and the population sensitivity to environmental stress during the invasion of a marginal, unstable habitat to demonstrate that a complex interaction between the Allee effect, sensitivity to environmental stress and the environmental conditions can determine the relative success of competing reproductive strategies during the initial invasion and long-term establishment in the marginal habitat. We discuss our results in the light of previous empirical and theoretical studies.

## 30 **Author Summary**

31 Individuals can reproduce with or without sex. Very often, closely related species are dis-  
32 tributed in a such a way that the sexually reproducing species is most frequently found in the  
33 core habitat while the asexually reproducing species is found on the edge of the habitat range.  
34 This biased distribution of reproductive strategies across a habitat range is called geographic  
35 parthenogenesis and has been observed in several species. While many processes have been pro-  
36 posed to explain such a pattern, a quantitative approach of the ecological processes was absent.  
37 We investigated important differences between sexual and asexual reproduction and how these  
38 differences affect the success of sexuals and asexuals invading a marginal, unstable environment.  
39 We showed that the relative frequency of each reproductive strategy in the marginal habitat  
40 depends on how much sexuals rely on population density to reproduce and how much asexu-  
41 als are affected by environmental stress relative to sexuals. Our study presents a quantitative  
42 ecological explanation for geographic parthenogenesis and provides the conditions under which  
43 different distribution patterns can emerge.

## 44 Introduction

45 Niche and habitat range expansion are key ecological processes in both population dynamics  
46 and interspecific competition. These processes are essentially dependent on the efficiency of  
47 the reproductive strategies that are characteristic of each population in the new niches or habi-  
48 tats. Therefore, understanding how different reproductive strategies can affect these processes  
49 is fundamental for understanding population dynamics and interspecific competition during in-  
50 vasion of previously uninhabited habitats [1]. Although many different reproductive strategies  
51 exist, they can all be defined based on the occurrence of fusion of gametes provided by different  
52 individuals (sexual) or absence of such process (asexual). These different strategies have differ-  
53 ent benefits and disadvantages; for example, while asexual reproduction gives individuals the  
54 independence to reproduce without the need to find compatible mating partners [2; 3], sexual  
55 reproduction generates genetic diversity that may keep the population alive under adverse en-  
56 vironmental conditions [4; 5; 6; 7]. Additionally, in many species, these reproductive strategies  
57 are not mutually exclusive, with individuals frequently switching between sexual and asexual  
58 reproduction [facultative modes of reproduction; 8; 9; 10; 11] or different populations having  
59 different reproductive strategies.

60 Because of the differences between sexual and asexual reproduction within a species, the ge-  
61 ographical distribution of individuals with different reproductive strategies often differs [12; 13].  
62 While sexuals are more abundant in the core habitat, where the species might have existed for  
63 a longer time, asexuals are often found in marginal habitats along the edge of the species distri-  
64 bution [14; 15; 16; 17; 18]. This pattern can be observed along the south-north gradient in the  
65 Northern Hemisphere, where glaciers have repeatedly wiped out northern populations and left  
66 the landscape open for recolonization from the south [19; 20], and also along elevation gradients  
67 in mountains, where climate becomes gradually harsher with altitude [21]. Similar patterns  
68 have been observed in aquatic environments along the salinity and temperature gradients, for  
69 example, in river-estuary complexes [22] and in the Baltic Sea [23; 24; 25; 26], where gradient  
70 extremes may be physiologically stressful for certain reproductive strategies. The mechanisms  
71 behind this spatial segregation (geographic parthenogenesis) are hotly debated and have been  
72 attributed to both evolutionary [e.g., 18; 19] and neutral random processes [27].

73 Genetic distribution patterns of geographic parthenogenesis have been investigated with

74 empirical and theoretical approaches, both in plants [15; 28] and animals [14; 21; 29]. For  
75 example, in the alpine plant species *Ranunculus kuepferi*, apomictic (asexual) populations ex-  
76 hibit high genetic admixture near sexual populations but are highly uniform in remote areas,  
77 with few well-supported genetic clusters [30], indicating the occurrence of multiple colonization  
78 events by genetically different founders. However, in the genera *Taraxacum* (dandelion) and  
79 *Chondrilla* (skeleton weed), apomictic populations exhibit high genetic diversity, which can be  
80 explained by crosses between apomictics and sexuals (in regions where these reproductive strate-  
81 gies are sympatric) followed by colonization of marginal regions, or crosses between facultative  
82 apomictics in purely apomictic regions [31; 32]. In *Daphnia pulex* (water flea), asexual popu-  
83 lations also exhibit elevated individual heterozygosities introduced by outcrosses [33], allowing  
84 outcrossed asexuals to displace sexuals due to the competitive advantages conferred by their  
85 admixed genotypes. Although these genetic differences between sexual and asexual *Daphnia*  
86 can explain the differences in the geographic distribution of different reproductive strategies, it  
87 is also possible that genetic differences can cause ecological differentiation between reproductive  
88 strategies, allowing them to coexist in the same habitat, as has been suggested by experiments  
89 [34]. In many cases, however, genetic diversity in parthenogenetic populations is generally low  
90 [35; 36; 37; 38; 39], which may be explained by the invasion of marginal habitats by a small  
91 number of asexual individuals.

92 Several theoretical aspects of geographic parthenogenesis have been studied [1]. The evo-  
93 lution of spatial segregation between sexual and asexual populations was explored in annual  
94 hermaphrodites with an individual-based model [20]. In the model, the metapopulation con-  
95 sisted of patches arranged along a south-north axis, with reproductive rate gradually decreasing  
96 in the north direction and each patching favoring a locally adapted phenotype. Population dy-  
97 namics led to asexual individuals exhibiting higher frequencies than sexual individuals in the  
98 north patches, which was explained by the gene flow from the south constraining sexual indi-  
99 viduals to evolve local adaptations to the habitats in the north, while asexuals maintained their  
100 locally advantageous genotype once it had appeared. It has been suggested that asexuals that  
101 are well adapted to marginal habitats retain their adaptation while sexuals can suffer from gene  
102 flow of suboptimal alleles from the core-habitat. Additionally, populations with metapopulation  
103 dynamics tend to show geographic parthenogenesis because of the higher tolerance of asexuals

104 to population bottlenecks and drift, allowing them to invade marginal habitats in small numbers  
105 [16]. On shorter time scales asexuals may also be better colonizers because they can reproduce  
106 without mating, thus avoiding the Allee effect that sexuals are subject to [16; 18]. A different  
107 model explored the effects of sexual conflict and mate limitation on the frequency of facultative  
108 parthenogens [40]. The magnitude of these effects together with levels of environmental produc-  
109 tivity were primary determinants of the spatial distribution of different reproductive strategies  
110 (sexual or facultative parthenogenesis). Parthenogenesis was particularly favored when low  
111 environmental productivity caused low population density at the edges of the habitat, making  
112 mating either too difficult or too costly. Other models have also resulted in distribution patterns  
113 of reproduction strategies that is typical of geographic parthenogenesis [e.g., 41].

114 However, many important aspects of geographic parthenogenesis remain, surprisingly, un-  
115 explored. The existence of different types of asexual reproduction [42; 43] and the ability to  
116 change between different reproductive strategies are important factors that need to be addressed.  
117 The magnitude of the Allee effect, which can be particularly important in sexual populations  
118 [44; 45; 46], may play an important role in leading to geographic parthenogenesis but has been  
119 essentially ignored. And finally, population sensitivity to environmental variation in marginal  
120 habitats may determine whether habitat range expansion is possible and which reproductive  
121 strategies can be the most successful during range expansion, and yet these factors have been  
122 overlooked in particular from the empirical perspective. Because of the necessity to address  
123 these processes as leading causes of geographic parthenogenesis, we developed a metapopula-  
124 tion model of competition between different reproductive strategies and assessed the ecological  
125 success of each competing strategy during short-term invasions and long-term establishment  
126 in unstable habitats, under different environmental conditions. Our model considers both the  
127 Allee effect (weak and strong) that affects sexually reproducing populations and the population  
128 sensitivity to stressful environmental conditions, which can be affected by genetic diversity. We  
129 use the temporal mean population size during initial invasion and long-term establishment as  
130 a measure of the ecological success of each competing strategy.

## 131 **Methods**

132 We model population dynamics in a metapopulation consisting of two qualitatively different  
133 patches. One patch (South patch) is assumed to host the larger, ancestral population, while the  
134 other patch (North patch or marginal habitat) is assumed to be a habitat that has been recently  
135 made available to the species under focus. The availability of a patch to a certain species can  
136 be affected by several factors (e.g., global warming may make northern ecosystems available  
137 to species that are typical from temperate climates). In our model, the South and North  
138 patches have different environmental properties, which are independent from the properties of  
139 the populations that they host. The South patch is characterized by a high environmental  
140 stability and hosts an ancestral population in equilibrium (Figure 1). Although, we use only  
141 two patches in the current study, the equations can be adapted to any number of patches.

142 The ancestral population consists of individuals that reproduce according to one of the  
143 following strategies, characterized by the properties of their growth rate:

144 (A) Obligate apomictic parthenogenesis (clonal reproduction): Individuals do not need to  
145 find a mating partner in order to reproduce, which can be advantageous when population  
146 density is low. However, parents and offspring are genetically identical (very limited  
147 genetic variation), which makes the population very sensitive to changes in environmental  
148 conditions.

149 (B) Obligate automictic parthenogenesis (non-clonal asexual reproduction): Individuals do  
150 not need to find a mating partner in order to reproduce, but unlike strategy A, parents  
151 and offspring are genetically different (to some extent) due to recombination during ga-  
152 mate production (limited but existent genetic variation). Because of the higher genetic  
153 variation, strategy B is assumed to be less sensitive to changes in environmental conditions  
154 than strategy A.

155 (C) Obligate sexual reproduction: Individuals need to find a compatible partner to mate with  
156 and parents and offspring are genetically different. Because of the difficulty in finding  
157 compatible mating partners when the population density is low, strategy C is affected by  
158 the Allee effect. With sexual reproduction, however, the population keeps a higher genetic  
159 diversity that can be beneficial when environmental conditions change.

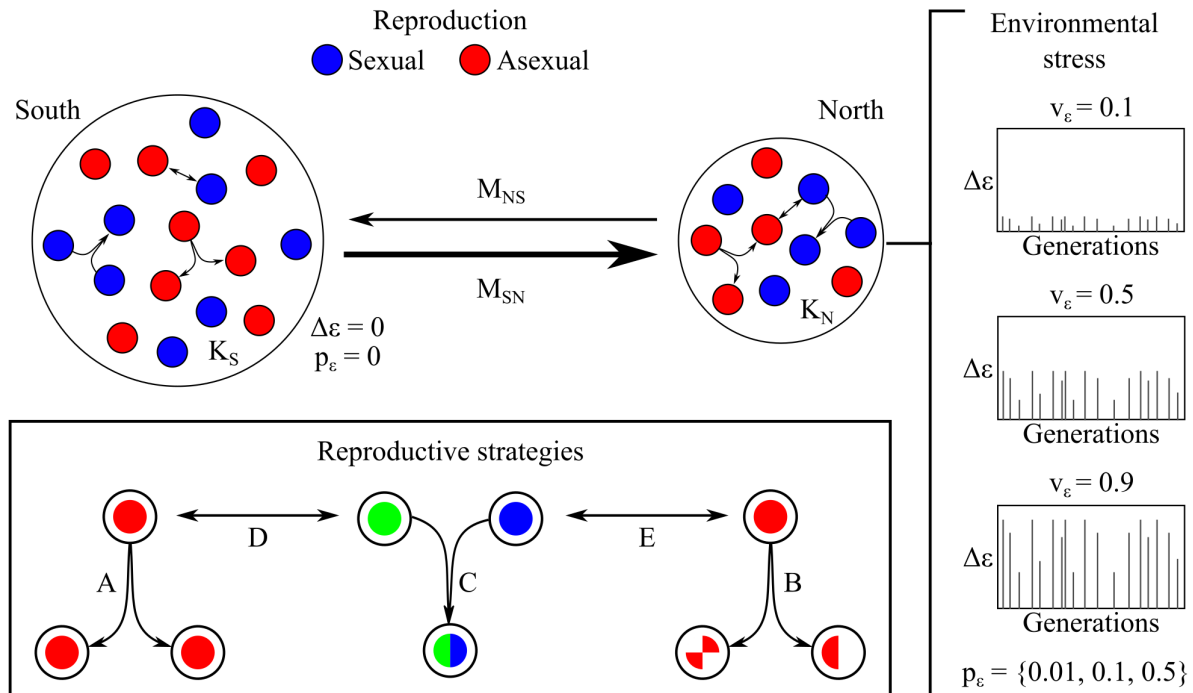

Figure 1: Graphical overview of the model design. Population dynamics include strategy-specific growth, transition and migration between an ancestral population (South patch) and a marginal habitat (North patch) where environmental conditions are unstable relative to the South patch. The panels to the right represent examples of three environmental regimes to which the North patch is exposed. Five different reproductive strategies were considered (bottom rectangle): obligate apomictic parthenogenesis or clonal reproduction (strategy A), obligate automictic parthenogenesis (strategy B), obligate sexual reproduction (strategy C), facultative apomictic parthenogenesis (strategy D) and facultative automictic parthenogenesis (strategy E). Complete description of the reproductive strategies in the main text. The subscripts/superscripts  $S$  and  $N$  indicate variables characterizing the South and North patches, respectively. The South patch differs from the North patch in its carrying capacity ( $K_S > K_N$ ), probability of occurrence of stressful events ( $p_\epsilon^S = 0$  and  $p_\epsilon^N > 0$ ), maximum environmental stress level ( $v_\epsilon^S = 0$  and  $v_\epsilon^N > 0$ ) and effective stress level ( $\Delta\epsilon^S = 0$  and  $\Delta\epsilon^N \geq 0$ ).  $M$  represents migration between patches.

- 160 (D) Facultative apomictic parthenogenesis: Individuals can transition between strategies A  
 161 and C after assessment of population density. Strategy D individuals are affected by the  
 162 same factors that affect strategies A and C when individuals act like such strategies. Strat-  
 163 egy D individuals reproducing asexually are designated D- and individuals reproducing  
 164 sexually are designated D+.
- 165 (E) Facultative automictic parthenogenesis: Individuals can transition between strategies B  
 166 and C after assessment of population density. Strategy E individuals are affected by  
 167 the same factors that affect strategies B and C when individuals act like such strategies.  
 168 Strategy E individuals reproducing asexually are designated E- and individuals reproduc-



169 ing sexually are designated E+.

170 It might be argued that strategy B (automictic parthenogenesis) is more sensitive to environ-  
171 mental stress than strategy A (apomictic parthenogenesis) because of the loss of heterozygosity  
172 in strategy B during reproduction. However, we consider the case where genomic diversity  
173 produced by automictic parthenogenetic reproduction is more beneficial than genomic homo-  
174 geneity under natural selection caused by environmental stress because homozygosity caused  
175 by automictic parthenogenesis introduces new phenotypes into the population.

176 Different strategies can affect one another indirectly through their effects on the total popu-  
177 lation density and transitions between reproductive strategies (sexual to asexual and vice-versa),  
178 as explained below. For ease of reference, we define subpopulation as the fraction of the patch-  
179 specific total population that is composed of individuals with a specific reproductive strategy.

## 180 Population dynamics

181 Population dynamics follow a logistic population growth model (Ricker model) with a variable  
182 growth rate, which is affected by environmental quality (carrying capacity), the Allee effect on  
183 strategies C-E, and environmental effects. Additionally, the total population density is affected  
184 by migration from/to the South patch. Change in subpopulation size from generation  $t$  to  
185 generation  $t + 1$  due to growth is defined by the following difference equation:

$$N_{p_i,t+1}^s = N_{p_i,t}^s \cdot \exp \left[ r_{p_i,t}^s \cdot \left( 1 - \text{sgn}(r_{p_i,t}^s) \cdot \frac{N_{p_i,t}}{K_{p_i} \cdot (1 - E_{p_i,t}^s)} \right) \right] + T_{p_i,t}^s + M_{p_i,t}^s \quad (1)$$

186 where the exponential term determines the logistic population growth rate based on the Ricker  
187 model and is equivalent to  $\lambda$  in exponential growth models,  $M_{p_i,t}^s$  is the net change in population  
188 size due to migration South-North or vice-versa and  $T_{p_i,t}^s$  is the number of transitions from  
189 sexual to asexual reproduction and vice-versa in strategies D-E. In strategies A-C,  $T_{p_i,t}^s = 0$ .  
190 It is important to note that transitions follow growth and migration follows transitions, which  
191 means that transitions are calculated based on the outcome of the logistic term and migration is  
192 calculated after transitions happen. In the logistic growth term,  $N_{p_i,t}^s$  is the subpopulation size of  
193 the reproductive strategy indicated by the superscript  $s$  in the patch indicated by the subscript  
194  $p_i$  ( $p_S$  for patch in the South and  $p_N$  for patch in the North) at time  $t$  (given in generations),  
195  $N_{p_i,t}$  is the patch-specific total population size,  $K_{p_i}$  is the patch-specific constant maximum

196 carrying capacity and  $E_{p_i,t}^s$  is the effect of changes in environmental conditions (explained in  
197 detail below). The variable  $r_{p_i,t}^s$  is the effective growth rate for the species under analysis after  
198 the reduction due to the Allee effect in strategies C-E. In strategies A and B,  $r_{p_i,t}^s$  is simply  
199 the intrinsic maximum growth rate (explained below). In order to account for possible negative  
200 effects caused by both the Allee effect and reduction in environmental quality, it is necessary to  
201 introduce  $sgn(r_{p_i,t}^s)$  so that multiple negative effects do not cancel each other.

## 202 Growth rates

203 All reproductive strategies have an equal intrinsic maximum growth rate  $r_{max}$ , which leads to  
204 exponential growth when the following conditions are met: unlimited resources or maximum  
205 environmental quality ( $K_{p_i} \rightarrow \infty$ ), no Allee effect ( $r_{p_i,t}^s \rightarrow r_{max}$ ), no environmental effect  
206 ( $E_{p_i,t}^s \rightarrow 0$ ) and no migration ( $M_{p_i,t}^s \rightarrow 0$ ). The maximum growth rate represents a biological  
207 limit in reproduction in the species under focus. By setting  $r_{max} = 1.1$ , we limit reproduction  
208 such that each individual can produce on average at most  $\lambda = e^{1.1} \approx 3$  offspring per generation  
209 (Figure S1).

## 210 Allee effect

211 The Allee effect is present in the sexually reproducing subpopulations (strategies C-E) and  
212 accounts for the difficulty in finding compatible mating partners when the population size  
213 is small. In strategies D-E, the Allee effect only affects sexuals (D+ and E+). In asexual  
214 individuals (strategies A, B, D- and E-),  $r_{p_i,t}^s = r_{max}$  because mating is not necessary in order  
215 to reproduce.

216 The Allee-dependent growth rate ( $A_{p_i,t}^s$ ) is lowest ( $r_{min}$ ) when the number of sexuals  $N_{p_i,t}^+ \rightarrow$   
217 0 and increases as  $N_{p_i,t}^+$  increases, until it reaches a biological limit ( $r_{max}$ ). This dynamic growth  
218 rate is defined by the following equation:

$$A_{p_i,t}^s = (r_{max} - r_{min}) \cdot \frac{\exp\left(\frac{N_{p_i,t}^+}{\alpha \cdot \beta \cdot K_{p_i}} - \frac{N_{p_i,t}^+}{\beta \cdot K_{p_i}}\right) - 1}{\exp\left(\frac{1}{\alpha} - 1\right) - 1} + r_{min} \quad (2)$$

219 where  $\alpha$  is the curvature of the function and  $\beta \cdot K_{p_i}$  is the population size (relative to the  
220 carrying capacity  $K_{p_i}$ ) at which  $A_{p_i,t}^s = r_{max}$ , that is, when growth rate reaches its biological  
221 limit (Allee saturation point), such that  $r_{p_i,t}^s = \min(A_{p_i,t}^s, r_{max})$  (Figure 2).

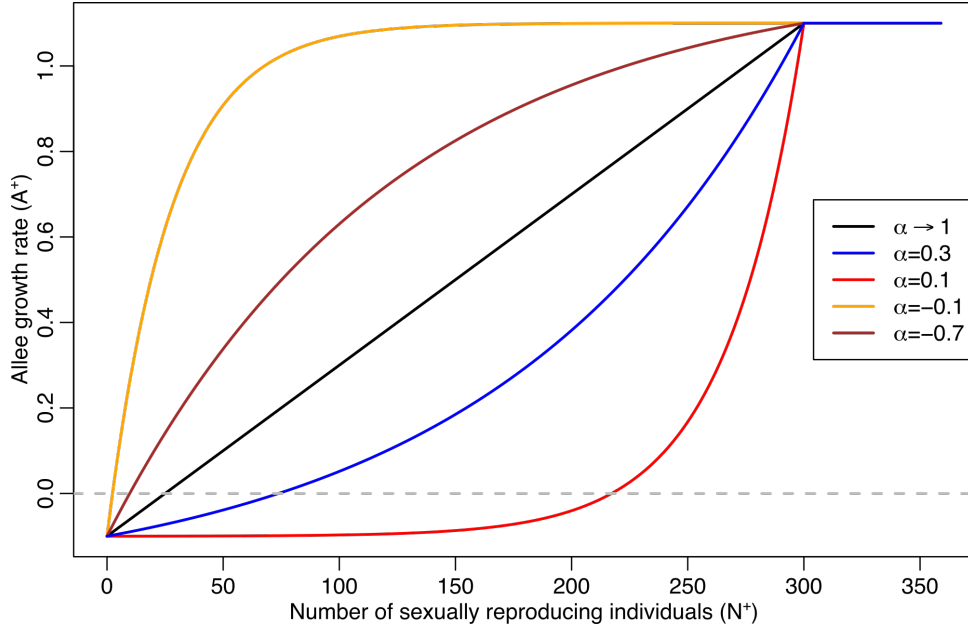

Figure 2: Allee function for different values of  $\alpha$ . Parameter values used:  $r_{min} = -0.1$ ,  $r_{max} = 1.1$ ,  $\beta = 0.3$ ,  $K_{p_N} = 1000$ .

222 Unlike previous models of the Allee effect, we assume that growth rate increases with pop-  
 223 ulation density (with a monotonic relationship) and it is bound by an explicit upper biological  
 224 limit. Difficulty in finding a compatible mating partner should always decrease with an increas-  
 225 ing population density and Equation 2 allows us to explore this effect by changing the rate of  
 226 change in growth rate (changes in  $\alpha$  and  $\beta$ ) as population density increases.

227 Our Allee model of growth rate has the following properties: (i)  $r_{p_i,t}^s = r_{min}$  when  $N_{p_i,t}^+ = 0$ ;  
 228 (ii)  $r_{p_i,t}^s = r_{max}$  when  $N_{p_i,t}^+ = \beta \cdot K_{p_i}$ ; and (iii)  $r_{p_i,t}^s = 0$  (no growth) when

$$N_{p_i,t}^+ = \frac{\alpha \cdot \beta \cdot K_{p_i} \cdot \text{Log} \left( \frac{e \cdot (r_{max} - r_{min})}{e \cdot r_{max} - e^{\frac{1}{\alpha}} \cdot r_{min}} \right)}{\alpha - 1} \quad (3)$$

229 We set  $r_{min} = -0.1$  (such that  $\lambda = e^{-0.1} \approx 0.9$ ) and assume that a very small subpopulation  
 230 size (below the Allee threshold indicated by Equation 3) of sexuals results in many individuals  
 231 dying before they have the chance to reproduce (negative net growth). Furthermore, we set  
 232  $K_{p_S} = 5000$  and  $K_{p_N} = 1000$  and explore values of  $\beta \in \{0.1, 0.2, 0.3\}$ , which means that the  
 233 maximum growth rate of the sexually reproducing subpopulation in the North patch is achieved  
 234 when the subpopulation size reaches  $N_{p_N,t}^+ \geq \beta \cdot K_{p_N}$  (which corresponds to 100, 200 and 300  
 235 individuals, respectively, as the population size at Allee saturation). The shape of the curve  
 236 of the Allee effect was explored by setting  $\alpha \in \{-0.7, 0.1, 0.3, \sim 1.0\}$  in different simulations.

237 When environmental conditions do not have an active effect on population dynamics ( $E_{p_i,t}^s = 0$ ),  
238 population growth is determined by the Allee effect and the carrying capacity of the patch,  
239 reaching its maximum when  $N_{p_i,t}^s = \beta \cdot K_{p_i}$ . In weak Allee effect scenarios, we set  $\alpha = 0.3$  and  
240  $\beta = 0.1$ ; in strong Allee effect scenarios, we set  $\alpha = 0.1$  and  $\beta = 0.3$  (Figure S2).

## 241 Environmental conditions

242 Environmental stress can decrease the population growth rate because the population is not  
243 adapted to the new environmental conditions (e.g., starvation, diseases, energetic stress, reduc-  
244 tion in resource availability due to anthropogenic disturbances). In our model, environmental  
245 stress reduces the effective carrying capacity of each reproductive strategy in the North patch,  
246 which is defined by  $K_{p_i} \cdot (1 - E_{p_i,t}^s)$  in Equation 1.

247 Because we are interested in how environmental stress affects population dynamics, we  
248 directly modeled environmental stress levels ( $\Delta\epsilon_t$ ) as scaled deviations from optimal environ-  
249 mental conditions ( $\Delta\epsilon_t^{p_i} = 0$ ) rather than the environmental variable itself. Our model assumes  
250 that environmental stress levels ( $\Delta\epsilon_t^{p_i}$ ) have the effect of reducing the patch-specific carrying  
251 capacity and therefore has a range  $0 \leq \Delta\epsilon \leq 1$ , with  $\Delta\epsilon = 0$  representing the complete absence  
252 of stress (optimal conditions) and  $\Delta\epsilon = 1$  representing maximum stress, with complete reduc-  
253 tion of the effective carrying capacity. Environmental stress occurs according to the following  
254 equation:

$$\Delta\epsilon_t^{p_i} = [U_t(0, 1) \leq p_\epsilon^{p_i}] \cdot U_t(0, v_\epsilon^{p_i}) \quad (4)$$

255 where  $p_\epsilon^{p_i}$  is the patch-specific probability of deviation from optimal environmental condi-  
256 tions and  $v_\epsilon^{p_i}$  is the patch-specific maximum deviation (maximum stress level). The term  
257  $[U_t(0, 1) \leq p_\epsilon^{p_i}]$  is a boolean indicator of presence (1) or absence (0) of change. Stressful en-  
258 vironmental events across generations are stochastic and take a value drawn from a uniform  
259 distribution  $U(0, v_\epsilon^{p_i})$ . We explored the effects of different probability values  $p_\epsilon^{p_i} \in \{0.01, 0.1, 0.5\}$   
260 and maximum stress levels  $v_\epsilon^{p_i} \in \{0.1, 0.5, 0.9\}$  (Figure S3) on the initial invasion and long-term  
261 establishment of different reproductive strategies in the marginal habitat (North patch).

262 Although environmental stress affects the effective carrying capacity of the patch, different  
263 reproductive strategies are sensitive to these changes at different degrees due to their different

264 genetic/phenotypic variation. We thus define  $0 \leq \phi^s \leq 1$  as the sensitivity to changes in the  
 265 effective carrying capacity of a patch due to environmental stress. We explored how sensitivity  
 266 can affect the ecological success of each strategy. Unless indicated otherwise, sensitivity to  
 267 environmental stress was assumed to be high in strategy A (clonal reproduction;  $\phi^A = 1.0$ , used  
 268 as a reference), intermediate in strategy B (non-clonal asexual reproduction;  $\phi^B = 0.75$ ) and  
 269 low in strategy C (sexual reproduction;  $\phi^C = 0.5$ ) as a consequence of their genetic/phenotypic  
 270 diversity. Note that strategy B differs from strategy A only in its sensitivity ( $\phi^B < \phi^A$ ). This  
 271 sensitivity effect is assumed to be a linear function of the environmental stress level, such that:

$$E_{p_i,t}^s = \phi^s \cdot \Delta \epsilon_t^{p_i} \quad (5)$$

272 Equation 5 indicates that environmental effects on population dynamics are absent when  
 273 environmental conditions are optimal ( $\Delta \epsilon_t^{p_i} = 0$ ) or the population is insensitive to changes in  
 274 the environmental factors under focus ( $\phi^s = 0$ ). As noted earlier, strategies D and E share the  
 275 properties of strategies A/C and B/C, respectively.

## 276 Reproductive transitions

277 In facultative parthenogenetic strategies (D and E), transitions between sexual and asexual re-  
 278 production (and vice-versa) happen at a maximum rate  $\tau$  and are affected by population density.  
 279 We assume that individuals cannot distinguish between those that are reproducing asexually  
 280 and those that are potential mating partners (sexual reproduction), so population assessment is  
 281 based on total population size. After assessment of population density, a proportion of strategy  
 282 D individuals transition from D- (asexual) to D+ (sexual) and vice-versa. Similarly, a pro-  
 283 portion of strategy E individuals transition from E- (asexual) to E+ (sexual) and vice-versa.  
 284 The net number of transitions from asexual (D-/E-) to asexual (D+/E+) reproduction ( $T_{p_i,t}^{s+}$ )  
 285 is calculated by the following equation:

$$T_{p_i,t}^{s+} = \tau \left[ \left( \frac{\min(N_{p_i,t}, \beta \cdot K_{p_i})}{\beta \cdot K_{p_i}} \right) \cdot N_{p_i,t}^{s-} - \left( 1 - \frac{\min(N_{p_i,t}, \beta \cdot K_{p_i})}{\beta \cdot K_{p_i}} \right) \cdot N_{p_i,t}^{s+} \right] \quad (6)$$

286 Equivalently, the net number of transitions from sexual (D+/E+) to asexual (D-/E-) repro-

287 duction ( $T_{p_i,t}^{s-}$ ) is calculated by the following equation:

$$T_{p_i,t}^{s-} = \tau \left[ \left( 1 - \frac{\min(N_{p_i,t}, \beta \cdot K_{p_i})}{\beta \cdot K_{p_i}} \right) \cdot N_{p_i,t}^{s+} - \left( \frac{\min(N_{p_i,t}, \beta \cdot K_{p_i})}{\beta \cdot K_{p_i}} \right) \cdot N_{p_i,t}^{s-} \right] \quad (7)$$

288 where  $N_{p_i,t}^{s-}$  is the patch-specific number of individuals in strategy D/E reproducing asexually (D-  
289 /E-) and  $N_{p_i,t}^{s+}$  is the patch-specific number of individuals in strategy D/E reproducing sexually  
290 (D+/E+).

291 It is important to note that we assume no cost associated with the ability to transition in  
292 strategy D/E and that these strategies are only reproducing sexually in the ancestral population  
293 because population size is above the Allee saturation. We assumed  $\tau = 0.2$  across all simulations.

## 294 Migration

295 Migration from/to the ancestral population in the South patch is density-dependent and is  
296 assumed to be greater in the north direction to stress the importance of habitat expansion in  
297 our model. Net migration ( $M_{p_i,t}^s$ , in number of individuals) is defined by the following equation:

$$M_{p_i,t}^s = \sum_{j \neq i} \left( \mu_{p_j \rightarrow i,t} \cdot \frac{\min(N_{p_j,t}, K_{p_j})}{K_{p_j}} \cdot N_{p_j,t}^s - \mu_{p_i \rightarrow j,t} \cdot \frac{\min(N_{p_i,t}, K_{p_i})}{K_{p_i}} \cdot N_{p_i,t}^s \right) \quad (8)$$

298 where  $\mu_{p_j \rightarrow i,t}$  is the effective migration rate from patch  $p_j$  to patch  $p_i$  and  $\mu_{p_i \rightarrow j,t}$  is the effective  
299 migration rate from patch  $p_i$  to patch  $p_j$ .

300 We made migration stochastic by defining the effective migration rate according to the  
301 following equation:

$$\mu_{p_i \rightarrow j,t} = \mu_{p_i \rightarrow j}^* \cdot [1 + \rho \cdot \mathcal{N}(0, 1)] \quad (9)$$

302 where  $\mu_{p_i \rightarrow j}^*$  is the mean migration rate,  $\rho$  is the magnitude of the stochasticity and  $\mathcal{N}(0, 1)$  is  
303 a standard normal deviate. We assumed  $\mu_{p_S \rightarrow N}^* = 0.01$ ,  $\mu_{p_N \rightarrow S}^* = 0.001$  and  $\rho = 0.1$  across all  
304 simulations.

## 305 **Ecological success during pairwise competition between strategies**

306 Due to the stochastic environmental changes affecting population dynamics throughout time,  
307 the population structure at the last time step cannot accurately describe the success of different  
308 strategies in invading and establishing in the North patch. We therefore used the long-term  
309 temporal mean population size of each reproductive strategy as a measurement of their ecological  
310 success. Furthermore, we compared the long-term temporal mean with the initial short-term  
311 temporal mean during the first one hundred generations (corresponding to the first 10% of the  
312 total number of generations used in the simulations). This comparison between long-term and  
313 initial temporal mean population sizes can indicate whether a particular reproductive strategy is  
314 more successful at invading an unstable environment and/or outcompeting a competing strategy  
315 in the long term.

316 In the competition simulations, we assumed that the South patch hosts a large ( $K_{p_S} = 5000$ )  
317 ancestral population composed of individuals that reproduce using different strategies, while the  
318 North patch is a smaller ( $K_{p_N} = 1000$ ), empty marginal habitat that is open and available for  
319 colonization. The North patch is partially connected to the South patch such that individuals  
320 can migrate between patches at a specified rate. Environmental conditions in the South patch  
321 are stable and do not change ( $p_e^{p_S} = 0$  and  $v_e^{p_S} = 0$ ), while the North patch experiences  
322 environmental stress at different levels. For all initial ancestral populations tested, we explored  
323 the effect of different environmental regimes in the North patch, in terms of probability of  
324 occurrence of stressful environmental conditions ( $p_e^{p_S} > 0$ ) and maximum level of stress ( $v_e^{p_S} > 0$ ).

325 Different compositions of the ancestral population were used in order to explore the inter-  
326 action effects of different strategies during habitat invasion and colonization. We analyzed the  
327 pairwise dynamics of habitat colonization in the North patch by setting ancestral populations  
328 composed of two different strategies for each possible combination of strategies, allowing us to  
329 investigate the effect of each strategy on each other strategy when they compete for dominance  
330 during invasion of the North patch. In the initial conditions, competing reproductive strategies  
331 in the ancestral populations were equally represented in terms of initial number of individuals  
332 ( $N_{p_S,0}^s = 0.5 \cdot K_{p_S}$ ). Because the initial subpopulation size of each strategy in the ancestral  
333 population is above the Allee threshold ( $\beta \cdot K_{p_S}$ ), all strategies have the same initial growth  
334 rate in the South patch. All simulations were performed on R version 3.5.2 [47].

## 335 Results

336 When the ancestral population in the South patch remains isolated (no migration between  
337 patches) and environmental conditions are stable (no environmental stress), population struc-  
338 ture (in terms of proportion of the population composed by each reproductive strategy) remains  
339 constant and no particular reproductive strategy is ecologically more successful than any com-  
340 peting strategy in terms of temporal mean population size. When the effect of density is  
341 ignored, strategies that reproduce asexually (A, B, D- and E-) have their maximum growth rate  
342 because environmental conditions are optimal and strategies that reproduce sexually (C, D+  
343 and E+) have their maximum growth rate both because environmental conditions are optimal  
344 and the subpopulation size is greater than the Allee saturation size. Therefore, sexual and asex-  
345 ual reproduction are equally successful under the baseline conditions present in the ancestral  
346 population.

347 In order to assess initial invasion and long-term ecological success of different reproductive  
348 strategies in the North patch, we calculated the temporal mean population size of the com-  
349 peting strategies during the first one hundred generations and in the long term (over the total  
350 simulation time). We then systematically analyzed the success of different strategies in different  
351 environments by changing the values of the parameters that control the Allee effect ( $\alpha$  and  $\beta$ )  
352 as well as environmental stress ( $p_e^{pN}$  and  $v_e^{pN}$ ) and sensitivity to environmental stress ( $\phi^B$  and  
353  $\phi^C$ ).

### 354 Population dynamics during invasion of a marginal, unstable habitat

355 When a marginal, unstable habitat (North patch) becomes available, migration from the ances-  
356 tral population (South patch) to the North patch drives the initial invasion of the North patch  
357 by both competing strategies proportionally to their frequencies in the ancestral population.  
358 Nonetheless, because the Northern population faces environmental conditions that are different  
359 from the conditions in the South patch, the population structure in the North patch diverges  
360 considerably from that in the South patch (e.g., Figure S4). Despite fluctuations in population  
361 size and composition due to environmental stress events, the population composition in the  
362 North patch reaches a clear pattern in terms of frequency dominance of different reproductive  
363 strategies for different environmental conditions. Note that, in many cases, strategies that per-



364 form better during the initial stages of invasion are not always the most successful in the long  
365 term (explained in more detail below).

366 Furthermore, the population structure in the North patch can affect the population structure  
367 in the South patch through migration. However, because the population size in the North patch  
368 is much smaller than in the South patch ( $K_{p_N} = 0.2K_{p_S}$ ) and migration from the North patch to  
369 the South patch occurs at a lower rate than in the opposite direction, changes in the population  
370 structure in the South patch occurs at a much lower rate (e.g., Figure S5). This lower rate of  
371 change can be explained by the small effect of the number of incoming individuals to the South  
372 patch relative to its population size.

### 373 **Allee effect and environmental stress**

374 In a general case, we simulated pairwise competitions between different strategies, focusing on  
375 the Allee effect under two environmental scenarios where the probability of environmental stress  
376 is  $p_\epsilon^{p_N} = 0.1$  and stress levels can be either low ( $v_\epsilon^{p_N} = 0.1$ ; Figures S6-S7) or high ( $v_\epsilon^{p_N} = 0.9$ ;  
377 Figures S8-S9). We then simulated pairwise competitions focusing on environmental variation  
378 when sexuals are under weak ( $\alpha = 0.3$  and  $\beta = 0.1$ ; Figures S10-S11) or strong ( $\alpha = 0.1$  and  
379  $\beta = 0.3$ ; Figures S12-S13) Allee effects.

380 In our model,  $\alpha$  and  $\beta$  determine the Allee effect curvature and saturation point, respectively,  
381 and therefore can explain some of the differences in ecological success between parthenogens  
382 (strategies A, B, D- and E-) and sexuals (strategies C, D+ and E+). According to our Allee  
383 function, the Allee effect becomes stronger when  $\alpha \rightarrow 0^+$  and  $\beta \rightarrow \infty$ ; and weaker when  
384  $\alpha \rightarrow 0^-$  and  $\beta \rightarrow 0$ . This can be observed in Figures S6-S9. The Allee effect is particularly  
385 important during the initial invasion, when sexuals struggle to reproduce while parthenogens  
386 thrive under low environmental stress. However, parthenogens are particularly sensitive to the  
387 probability of encountering stressful conditions ( $p_\epsilon^{p_N}$ ) and the level of stress experienced  $v_\epsilon^{p_N}$ ,  
388 often allowing sexuals to outcompete them under stressful conditions even when the Allee effect  
389 is moderate (Figures S10-S13). In the long term, even when the Allee effect is strong, sexuals  
390 can outcompete parthenogens, showing a greater temporal mean population size. Because  
391 of the complex interactions between sensitivity to environmental stress and Allee effect, we  
392 analyzed each pairwise competition separately focusing on the biological properties of each

393 strategy (below).

### 394 **Obligate apomictic vs. obligate automictic parthenogenesis**

395 Strategy A (obligate apomictic parthenogenesis) was assumed to have maximum sensitivity to  
396 environmental stress ( $\phi^A = 1.0$ ), while strategies B (obligate automictic parthenogenesis) and  
397 C (obligate sexual reproduction) were assumed to have a lower sensitivity ( $\phi^A > \phi^B > \phi^C$ ).  
398 Since apomictic and automictic parthenogens differ only in the magnitude of their response to  
399 environmental stress, competition between these strategies is expected to favor the dominance  
400 of automictic parthenogens (strategy B), and lower sensitivity ( $\phi^B \ll \phi^A$ ) leads to a greater  
401 dominance of automictic parthenogens in the population (Figures [S14-S15](#)). This is a conse-  
402 quence of the assumption that automictic parthenogenesis has no extra fitness cost relative  
403 to apomictic parthenogenesis but generates phenotypic diversity which reduces the sensitivity  
404 of the population to environmental stress. This difference in temporal mean subpopulation  
405 size of apomictic and automictic parthenogens is particularly strong under highly stressful con-  
406 ditions ( $v_e^{pN} = 0.9$ ). However, although our model assumes there is a sensitivity difference  
407 between apomictic and automictic parthenogenesis, empirical data quantifying the magnitude  
408 of this difference is absent. Additionally, fitness costs of automictic parthenogenesis relative to  
409 apomictic parthenogenesis remain unexplored.

### 410 **Obligate parthenogenesis vs. obligate sexual reproduction**

411 As mentioned above, growth rate of obligate sexuals is affected not only by their sensitivity to  
412 environmental stress but also by the Allee effect caused by the difficulty in finding compatible  
413 mating partners when the population size is small. If the Allee effect is weak ( $\alpha = 0.3$  and  
414  $\beta = 0.1$ ) during the initial invasion of the marginal habitat, parthenogenetic reproduction is  
415 particularly favored when environmental stress is low ( $v_e^{pN} = 0.1$ ), while sexual reproduction  
416 is particularly favored under high environmental stress ( $v_e^{pN} = 0.9$ ) as long as their sensitivity  
417 is low enough to overcome the Allee effect (Figure [S16](#)). In the long term, sexuals outperform  
418 parthenogens even when their sensitivity to environmental stress ( $\phi^C = 0.9$ ) approaches that of  
419 parthenogens, although in such cases the difference in ecological success is small (Figure [S17](#)). If  
420 the Allee effect is strong ( $\alpha = 0.1$  and  $\beta = 0.3$ ), however, parthenogens ( $\phi^A = 1.0$ ) are generally

421 more successful than sexuals during the initial invasion and in the long term, except when  
 422 sexuals are considerably less sensitive than parthenogens under very stressful environmental  
 423 conditions ( $v_\epsilon^{pN} = 0.9$ ), significantly reducing the population growth rate of parthenogenetic  
 424 invaders (Figure 3-4).

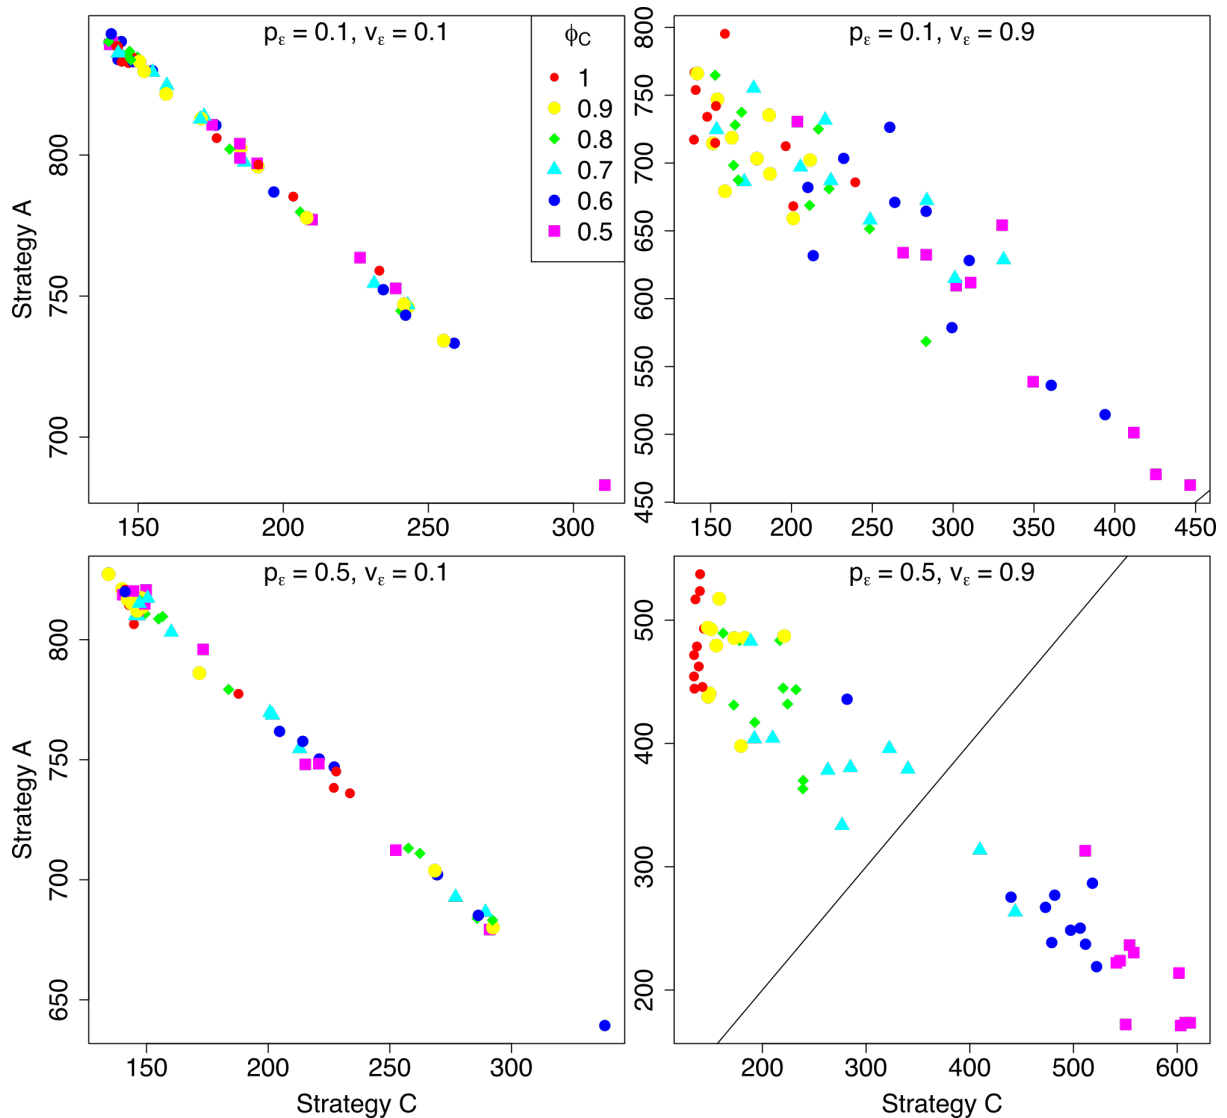

Figure 3: Obligate parthenogenesis (strategy A/B) vs. obligate sexual reproduction (strategy C). Axes represent the short-term temporal mean population sizes of competing strategies in the marginal habitat (North path) under a strong Allee effect ( $\alpha = 0.1$  and  $\beta = 0.3$ ). Note that  $\phi$  represents the relative difference in sensitivity to environmental stress between apomictic (strategy A;  $\phi^A = 1.0$ ) and automictic (strategy B;  $\phi^B$ ) parthenogenesis, or between parthenogenesis (strategy A;  $\phi^A = 1.0$ ) and sexual reproduction (strategy C;  $\phi^C$ ).

425 In a deterministic simulation, with a constant environmental stress level in the marginal  
 426 habitat ( $\Delta\epsilon \in \{0.1, 0.5, 0.9\}$ ) and constant migration rates ( $\rho = 0$ ), increasing the magnitude  
 427 of the Allee effect ( $\alpha \rightarrow 0^+$ ;  $\beta = 0.3$ ) and the environmental sensitivity of sexuals ( $\phi^C$ ) relative

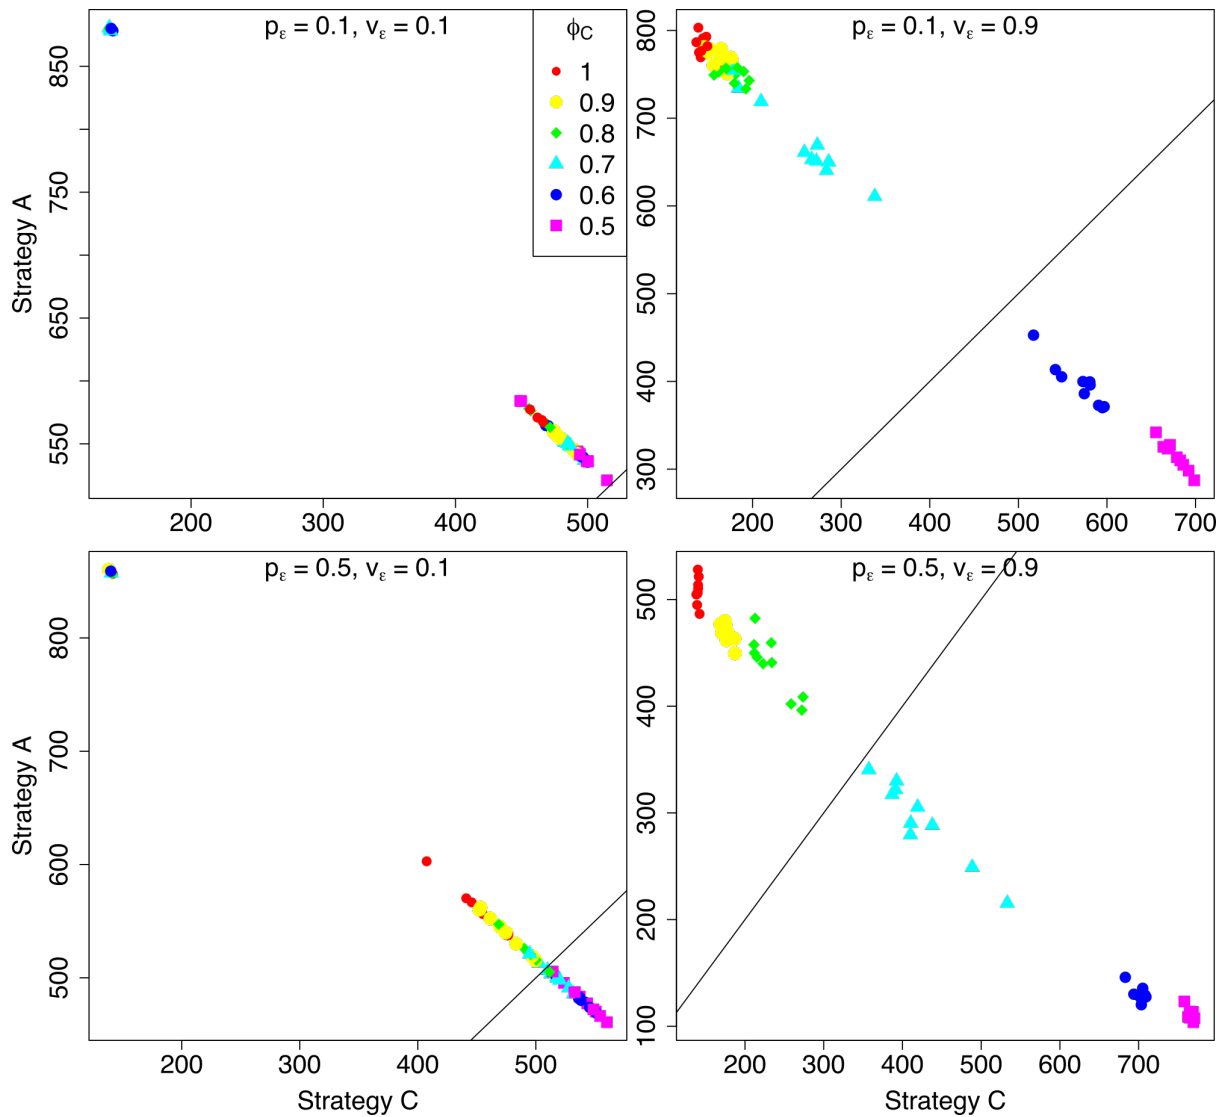

Figure 4: Obligate parthenogenesis (strategy A/B) vs. obligate sexual reproduction (strategy C). Axes represent the long-term temporal mean population sizes of competing strategies in the marginal habitat (North path) under a strong Allee effect ( $\alpha = 0.1$  and  $\beta = 0.3$ ). Note that  $\phi$  represents the relative difference in sensitivity to environmental stress between apomictic (strategy A;  $\phi^A = 1.0$ ) and automictic (strategy B;  $\phi^B$ ) parthenogenesis, or between parthenogenesis (strategy A;  $\phi^A = 1.0$ ) and sexual reproduction (strategy C;  $\phi^C$ ).

428 to parthenogens ( $\phi^C$  approaches  $\phi^A$ ) increases the temporal dominance of parthenogens in the  
 429 marginal habitat ( $\overline{N}_A/\overline{N}_C > 1$ ; Figure 5). However, this effect is weaker in the long term.

430 In general, sexuals become less successful than parthenogens when  $\beta$  is large (e.g.,  $\beta = 0.3$ ),  
 431 demanding a greater population size in order to reach Allee saturation ( $\beta \cdot K_{p_N}$ ), and  $\alpha$  is  
 432 positive and close to zero ( $\alpha = 0.1$ , in our simulations), demanding a greater population size in  
 433 order to reach the Allee threshold (Equation 3). If the Allee threshold and saturation point are  
 434 large, sexuals will only be more successful than parthenogens under three conditions: over a very

435 large number of generations (assuming no extinction;  $> 1000$  generations); when environmental  
 436 stress levels are high such that parthenogens are affected more strongly than sexuals under a  
 437 strong Allee effect; or when the *per capita* growth rate is high enough for the Allee threshold and  
 438 saturation point to be reached in a relatively short period of time (not shown here). These results  
 439 show that, for obligate sexuals (strategy C) to outcompete obligate parthenogens (strategies A  
 440 and B), there must be a balance between their sensitivity to environmental stress and the Allee  
 441 effect that they are subject to such that the net growth rate of obligate sexuals becomes greater  
 442 than the net growth rate of obligate parthenogens.

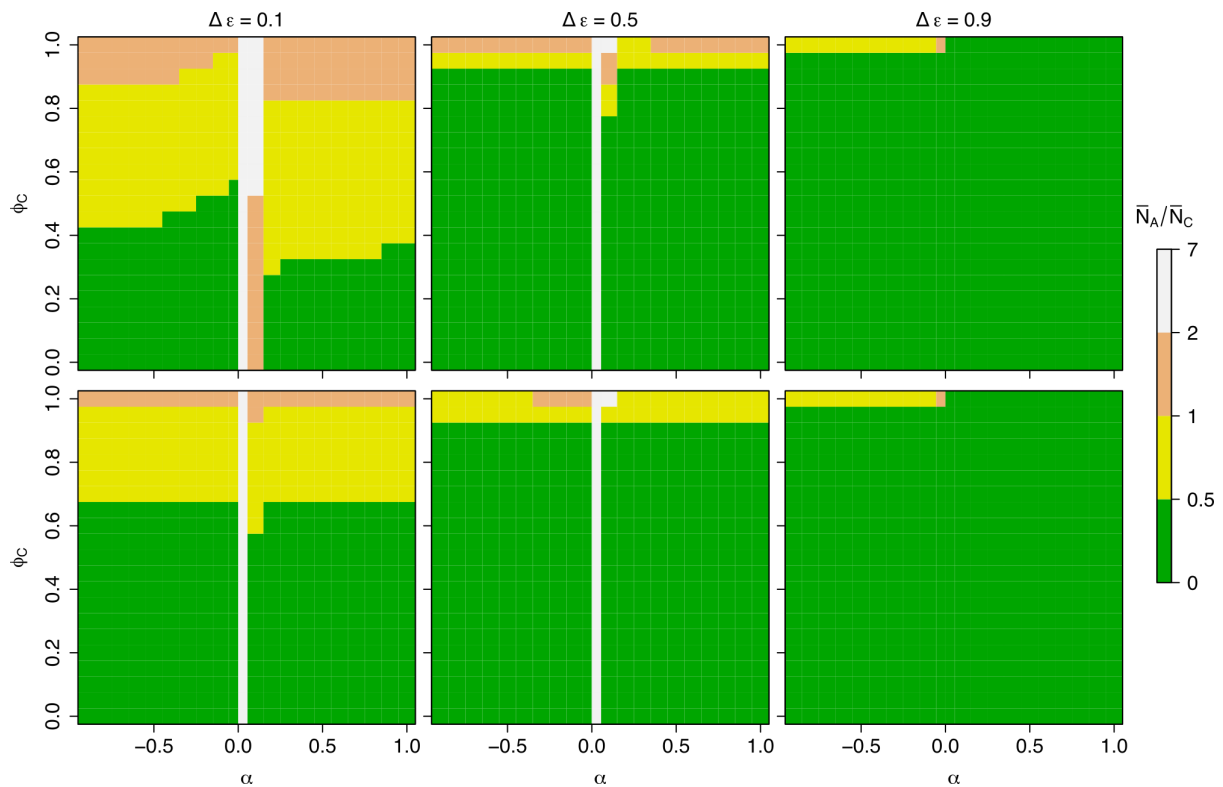

Figure 5: Obligate parthenogenesis (strategy A/B) vs. obligate sexual reproduction (strategy C). Deterministic ratio of short-term (top row) and long-term (bottom row) mean population sizes of obligate parthenogens to obligate sexuals ( $\bar{N}_A/\bar{N}_C$ ) under constant environmental stress levels in the marginal habitat ( $\Delta \epsilon \in \{0.1, 0.5, 0.9\}$ ), constant migration rates ( $\rho = 0$ ), different values of  $\alpha$  (Allee curve;  $\beta = 0.3$ ) and different environmental sensitivity values of sexuals relative to parthenogens (variable  $\phi^C$ , with constant  $\phi^A = 1.0$ ).

#### 443 Facultative parthenogenesis vs. obligate sexual reproduction

444 Among sexually reproducing strategies, facultative parthenogens (strategy D/E) can perform  
 445 significantly better than obligate sexuals (strategy C) because of their ability to reproduce asexually  
 446 when the population size is small, partially avoiding the Allee effect. Under a weak Allee

447 effect, both strategies are equally successful (Figures S18-S19). Differences are visibly signifi-  
 448 cant when the Allee effect is strong (Figures 6-7) and transitions from sexual to parthenogenetic  
 449 reproduction become particularly advantageous during the initial invasion. Furthermore, the  
 450 difference in temporal mean population size between strategies increases as sexuals become  
 451 more sensitive to environmental stress, reducing the advantage of sex even further especially  
 452 under stressful conditions. A higher transition rate  $\tau$  can also increase the success of faculta-  
 453 tive parthenogens, but the increase is only visible under stressful environmental conditions and  
 454 strong Allee effect on sexuals (Figures S20-S21).

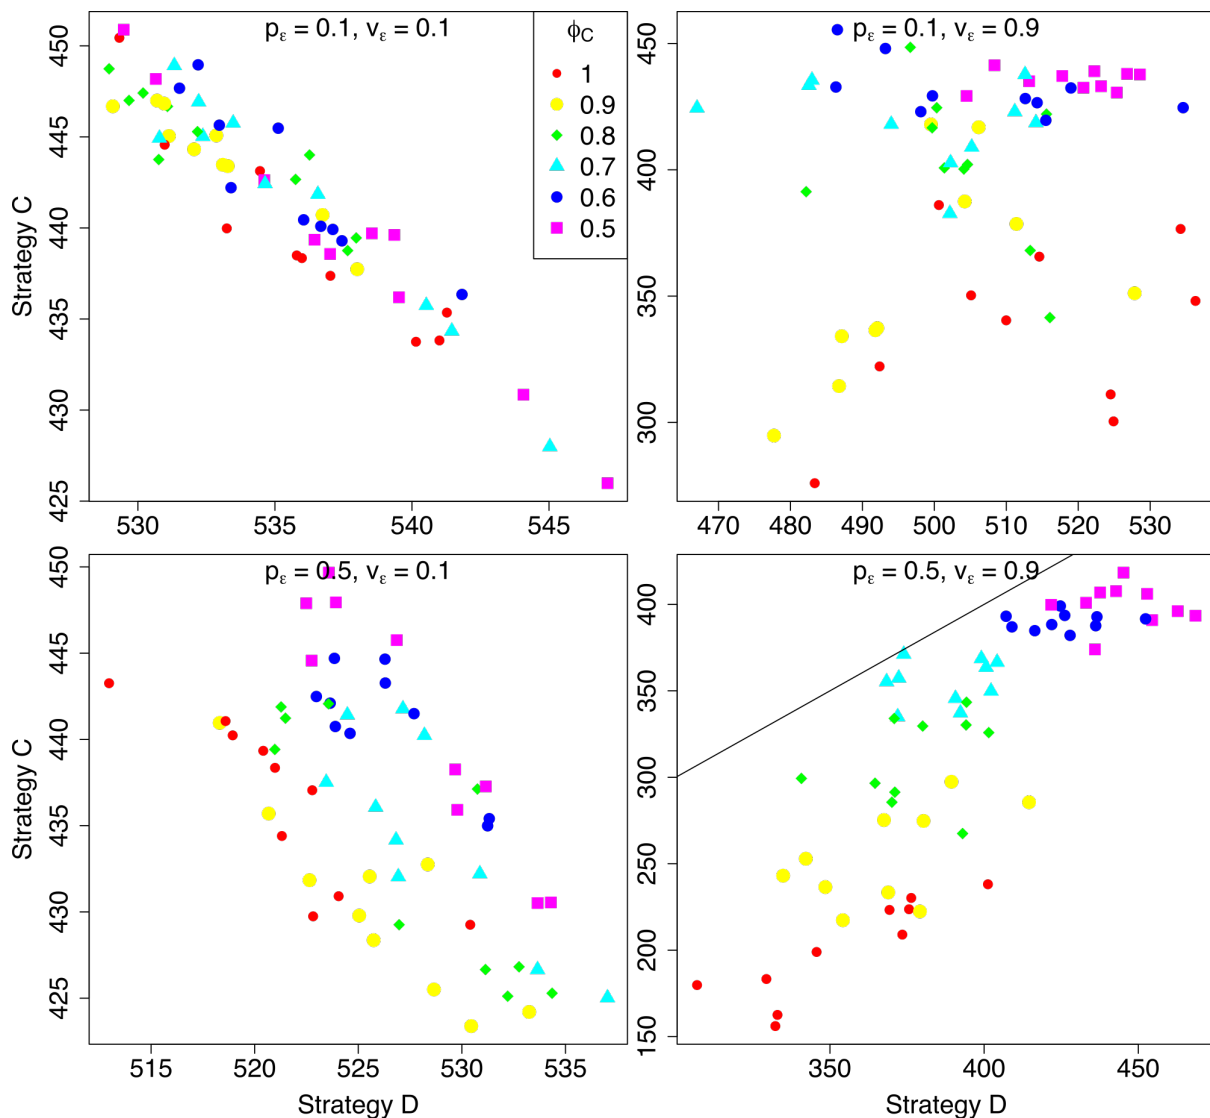

Figure 6: Obligate sexual reproduction (strategy C) vs. facultative parthenogenesis (strategy D/E). Axes represent the short-term temporal mean population sizes of competing strategies in the marginal habitat (North path) under a strong Allee effect ( $\alpha = 0.1$  and  $\beta = 0.3$ ). Note that  $\phi$  represents the relative difference in sensitivity to environmental stress between apomictic (strategy A;  $\phi^A = 1.0$ ) and automictic (strategy B;  $\phi^B$ ) parthenogenesis, or between parthenogenesis (strategy A;  $\phi^A = 1.0$ ) and sexual reproduction (strategy C;  $\phi^C$ ).

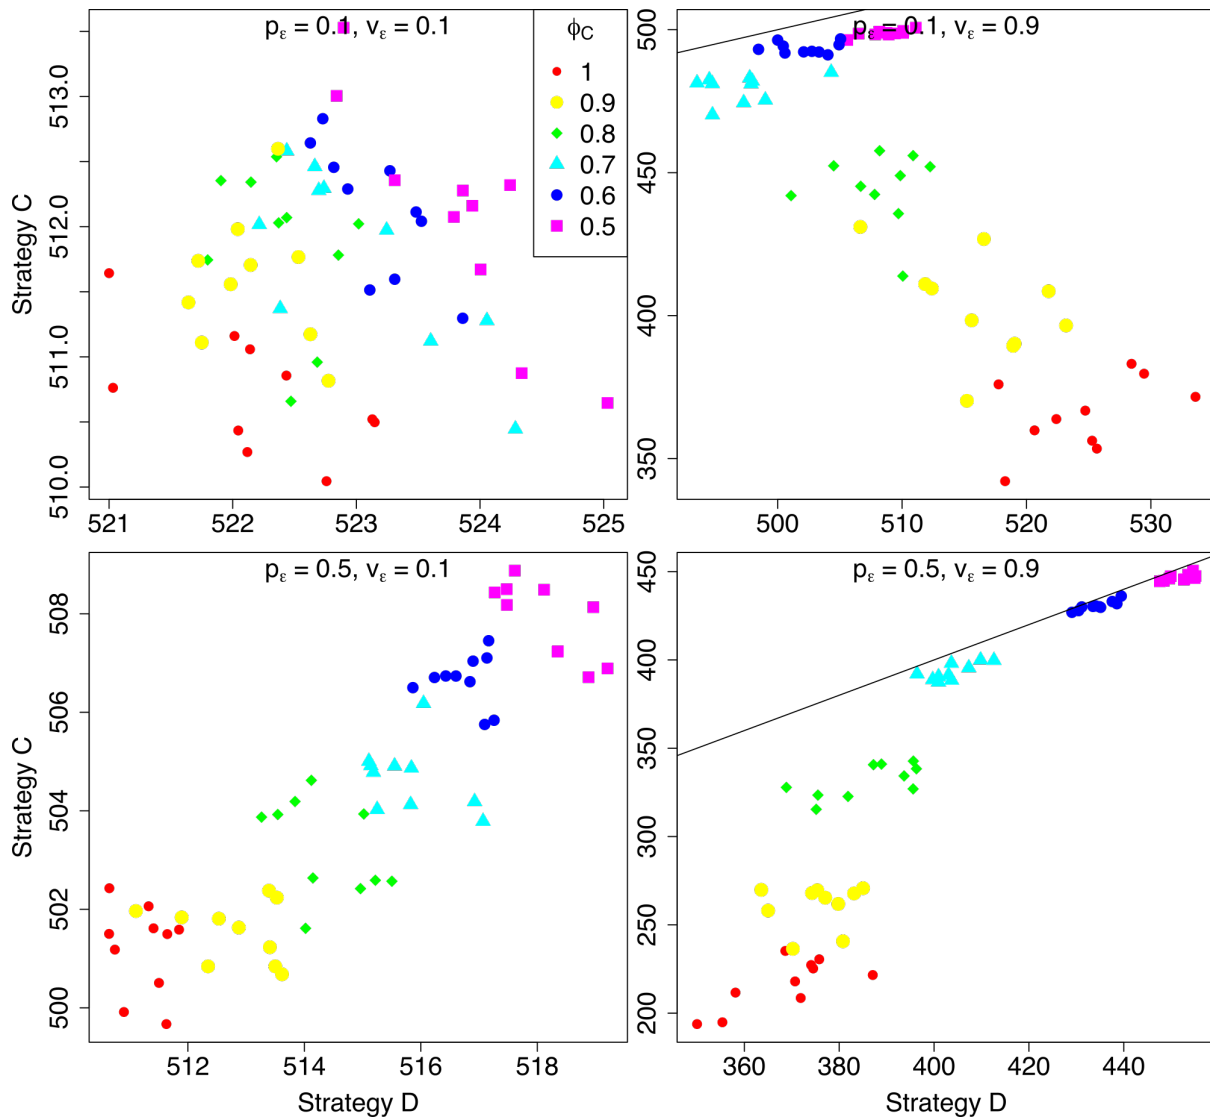

Figure 7: Obligate sexual reproduction (strategy C) vs. facultative parthenogenesis (strategy D/E). Axes represent the long-term temporal mean population sizes of competing strategies in the marginal habitat (North path) under a strong Allee effect ( $\alpha = 0.1$  and  $\beta = 0.3$ ). Note that  $\phi$  represents the relative difference in sensitivity to environmental stress between apomictic (strategy A;  $\phi^A = 1.0$ ) and automictic (strategy B;  $\phi^B$ ) parthenogenesis, or between parthenogenesis (strategy A;  $\phi^A = 1.0$ ) and sexual reproduction (strategy C;  $\phi^C$ ).

#### 455 Obligate parthenogenesis vs. facultative parthenogenesis

456 As mentioned above, facultative parthenogens (strategy D/E) reproduce sexually in the ances-  
 457 tral population because of the large population size and high environmental stability, so incom-  
 458 ing migrants to the marginal habitat are subject to the Allee effect during the very first wave  
 459 of migration, which can explain their lower ecological success relative to obligate parthenogens  
 460 (strategy A/B) when sexuals and parthenogens have similar sensitivities to environmental stress

461 (Figures S22-S25). When sexuals are considerably less sensitive, the advantage of sex can com-  
462 pensate for the Allee effect and lead to a higher ecological success of facultative parthenogens  
463 even under a strong Allee effect. The balance between sensitivity to environmental stress and  
464 the Allee effect that equalizes the success of sexuals (including facultative parthenogens) and  
465 obligate parthenogens depends on the environmental conditions experiences. For example, un-  
466 der highly stressful environmental conditions ( $p_{\epsilon}^{pN} = 0.5$  and  $v_{\epsilon}^{pN} = 0.9$ ), sexuals under a strong  
467 Allee effect must be relatively less sensitive than sexuals under a weak Allee effect in order to  
468 outcompete parthenogens.

## 469 Discussion

470 Our results show that the relative frequency of a reproductive strategy in a marginal habitat can  
471 be determined by a complex interaction between the environmental conditions in that habitat,  
472 the magnitude of the Allee effect and the relative sensitivity of competing strategies to environ-  
473 mental stress. These factors may explain the empirically observed biased distribution of sexuals  
474 and asexuals (parthenogens) along a habitat range, with asexuals being particularly abundant  
475 in marginal habitats, a pattern that characterizes geographic parthenogenesis. In our model,  
476 an equal maximum intrinsic growth rate was assumed for sexual and asexual reproduction and,  
477 therefore, our results shed light on the importance of ecological (non-reproductive) processes as  
478 explanatory causes of geographic parthenogenesis.

### 479 Geographic parthenogenesis and range expansion

480 Previous models explored different processes that can lead to geographic parthenogenesis. A  
481 spatially explicit genetic model showed that asexuals may be favored by local adaptation to a  
482 marginal habitat through clone selection and protection of optimal genotypes from gene flow  
483 from the core habitat [20]. Geographic parthenogenesis can also result from selection for re-  
484 sistance and high fecundity in a facultatively parthenogenetic metapopulation occupying an  
485 environmental gradient, limiting mating at the edge of the habitat and forcing females to re-  
486 produce asexually, generating a female bias [40]. However, the ecological success of asexual  
487 reproduction certainly depends on the environmental conditions and the characteristics of the  
488 competing reproductive strategy. A model exploring the frozen niche variation hypothesis [48]



489 indicated that, despite its two-fold advantage relative to sexual reproduction [2], asexual clonal  
490 reproduction may have its invasion probability reduced due to a fast accumulation of deleterious  
491 mutations in the initially small clonal population [49], decreasing its initial advantage of  
492 local adaptation. Clonal invasion probability can be reduced even further when sexual popu-  
493 lations have many niche phenotypes, requiring the occurrence of a beneficial mutation for niche  
494 exploration within the asexual clonal population before individuals can invade a niche occupied  
495 by sexuals [49]. Additionally, it has been proposed that metapopulation dynamics in marginal  
496 habitats may be detrimental to sexuals because they may suffer more intensely from genetic  
497 bottlenecks and inbreeding [16].

498 Although most studies focus on the coexistence or elimination of reproductive strategies as  
499 a result of active selection leading to evolutionary change, it has been shown theoretically that  
500 stochastic demographic processes may lead to geographic structure in the distribution of sexual  
501 and asexual morphs in recently invaded areas without having to invoke adaptive differences.  
502 However, these patterns (e.g. clone dominance) are transient and are eventually substituted by  
503 sexual reproduction [27]. Other models explored the distribution of individuals within a habitat  
504 and the factors that determine population range limits, although not in the context of geographic  
505 parthenogenesis. However, because parthenogens are typically found in marginal habitats, the  
506 study of range limits can be particularly useful for understanding the geography of reproductive  
507 strategies. Range limits may have many causes, each leading to different evolutionary outcomes  
508 [50], with range expansion being typically initiated through dispersal and subsequent niche  
509 evolution in the new habitat. This process of dispersal leading to range expansion has been  
510 explored in the context of a species invasion of a novel habitat, where niche evolution has  
511 been found to be affected by several factors, including the initial maladaptation of the invading  
512 population, mutation rate and degree of heterogeneity in the occupied range [51]. These factors,  
513 as mentioned in the present study, can affect different reproductive strategies differently and  
514 therefore lead to the observed biased geographic distribution at the population range limits  
515 (e.g., [52]). The Allee effect on sexual populations, for example, can explain the difference in  
516 the spatial distribution of sexuals and asexuals during range expansion.

## 517 **The Allee effect on population dynamics**

518 The Allee effect explored in our model reduces the growth rate of sexual populations when  
519 the population size is small. This effect has been observed in many populations and has been  
520 suggested to cause species extinctions [53; 54]. For example, experimental observations from  
521 the annual herb *Clarkia concinna* suggest that small populations are more likely to go extinct  
522 because of the Allee effect caused by the lack of effective pollination, leading to reproductive  
523 failure [55]. In populations of the shrub *Banksia goodii*, there is a clear positive relationship  
524 between population size, number of seeds per unit population size and fraction of fertile plants,  
525 with very small populations producing a disproportionately small number of seeds, a pattern  
526 that resembles the strong Allee effect ( $\alpha = 0.1$  and  $\beta = 0.3$ ) used in our model and that can  
527 lead to local extinction [56]. In natural populations of the Glanville fritillary butterfly *Melitaea*  
528 *cinxia*, the fraction of mated females decreases with decreasing local population density, resulting  
529 in a reduced reproductive success in small populations [57]. This density-dependent growth rate  
530 has also been detected in many populations of the Atlantic herring *Clupea harengus* [58] and  
531 even in the bacterium *Vibrio fischeri* [59]. In the latter study, experiments using different  
532 initial population sizes of *Vibrio fischeri* showed a non-linear positive relationship between  
533 initial population density and the proportion of populations establishing in the media at the  
534 time of measurement, indicating a reduction in population growth rate when population density  
535 is low [59].

536 This positive density-dependent reproductive rate has also been explored from a theoretical  
537 perspective. The Allee effect was used in a model to predict the rate of population spread in the  
538 house finch *Carpodacus mexicanus* and density of birds near the center of the range [60], with a  
539 weak Allee effect, measured in terms of the fraction of birds mated as a function of population  
540 density, resembling the Allee curve with  $\alpha = -0.1$  in our model. A different model explored the  
541 Allee effect from the perspective of mate location dynamics, showing that very low population  
542 densities decrease the recognition of potential conspecific mates and therefore the probability of  
543 mating, driving the population to extinction [54]. The identification of conspecific mates is one  
544 of the factors that affects the Allee effect and should be taken into consideration in the future  
545 when calculating empirical values of  $\alpha$  and  $\beta$  for the Allee curve given by Equation 2 in the  
546 present model.

547 More general models showed that the Allee effect may reduce the rate at which an invader  
548 moves to a new environment [61; 62] and the interaction between interspecific competition and  
549 the Allee effect can result in stability patterns that differ from models that ignore Allee effects  
550 [63; 64], which is also important for the competitive dynamics between different reproductive  
551 strategies explored in the current study. In the context of metapopulations, it has been suggested  
552 that the Allee effect may prevent small metapopulations from increasing even when resources  
553 are abundant or make large metapopulations go extinct due to stochastic environmental stress  
554 events when the number of occupied patches is small [65; 66]. Because of that, the effect of  
555 stressful events on population growth can affect the invasion of marginal habitats and subsequent  
556 range expansion.

### 557 **Environmental effects on population growth**

558 Our model also considered the sensitivity of the population to environmental stress, which may  
559 depend on genetic and phenotypic diversity. Empirical studies in both animals and plants have  
560 shown that the founder genotypic and heritable phenotypic diversity is key to successful inva-  
561 sion, range expansion and establishment in new habitats where the population may find novel  
562 (stressful) environmental conditions [67]. An experimental study in the flour beetle *Tribolium*  
563 *castaneum* showed that the probability of a founding population going extinct and the mean  
564 population size after several generations are, respectively, inversely proportional and directly  
565 proportional to the founding level of genetic variation [68]. In the clonal plant *Ranunculus*  
566 *reptans*, when introduced to previously unoccupied habitats and exposed to severe stressful  
567 conditions (flood and drought), populations founded by different genetic sources increased in  
568 abundance relative to populations founded by genetic monocultures [69]. Interestingly, studies  
569 analyzing genetic diversity as a function of distance to the core habitat (central population)  
570 show that central populations have significantly higher diversity than populations located at  
571 marginal habitats [70], indicating that marginal populations may be more sensitive to environ-  
572 mental stress and that genetic diversity may be restricted in such habitats.

573 It has been suggested that in populations where genetic diversity is very limited (e.g., clonal  
574 populations) adaptation to stressful environmental conditions can be difficult when relying on  
575 new mutations, leading populations to decline or go extinct [71]. This negative relationship be-

576 tween genetic diversity and risk of extinction affects parthenogenetic populations more strongly  
577 than sexual populations but this risk can be reduced when the parthenogenetic population  
578 is multiclonal instead of monoclonal [48]. In our model, parthenogenetic populations are more  
579 sensitive to environmental stress and thus more likely to decline under stressful conditions. How-  
580 ever, because of the constant migration from the ancestral population to the marginal habitat,  
581 the dynamics in our model does not lead to local extinction. It is important to note that pop-  
582 ulations declining due to sensitivity to stressful environmental conditions can resume growing  
583 when new genetic variation is introduced from different sources, a process called evolutionary  
584 rescue [72; 73], which may be achieved via, for example, sexual reproduction in clonal popula-  
585 tions of facultative parthenogens. Because increased asexual reproduction is common towards  
586 marginal habitats, those populations are also more likely to decline when challenged by changes  
587 in environmental conditions, which can make facultative parthenogenesis particularly benefi-  
588 cial. In the Baltic Sea, asexual recruitment seems to be very common in many macrophytic  
589 populations, but sexual recruitment is not completely absent [74], supporting the idea that the  
590 ability to transition between sexual and asexual reproduction is beneficial. Because of all these  
591 processes related to the effect of environmental stress on population growth, it is important that  
592 future studies provide empirical measurements of the correlation between genetic/phenotypic  
593 diversity and population sensitivity to different types of environmental stress.

## 594 **Conclusion**

595 We used a quantitative approach to explore the ecological processes that can lead to geographic  
596 parthenogenesis and the invasion of new habitats by different reproductive strategies. We an-  
597 alyzed the Allee effect on sexual populations and the population sensitivity to environmental  
598 stress during the invasion of a marginal, unstable habitat to demonstrate that a complex in-  
599 teraction between the Allee effect, sensitivity to environmental stress and the environmental  
600 conditions can determine the relative success of competing reproductive strategies during the  
601 initial invasion and long-term establishment in the marginal habitat. In particular, sexuals need  
602 to compensate for the reduction in growth rate due to the Allee effect through a reduced sensi-  
603 tivity to environmental stress. However, the reduction in sensitivity is only strongly beneficial  
604 under highly stressful environmental conditions. Unfortunately, despite the empirical evidence

605 for the Allee effect and differential sensitivity to environmental stress, empirical quantification  
606 of such processes remain scarce. Controlled and accurate quantification of the Allee effect on  
607 population growth in nature are difficult to obtain because many factors (both ecological and  
608 genetic) may affect the magnitude of the effect. We suggest that the following processes may  
609 play particularly important roles: (i) the distribution pattern of the immigrants (e.g., uniform  
610 vs. aggregated distribution) in the marginal habitat; (ii) migration rate, which can affect the  
611 speed at which the Allee threshold is reached; (iii) sexual selection (in particular, female choice,  
612 which can limit mating); and (iv) sociality, which can create an Allee effect even in asexual  
613 populations. Similarly, sensitivity to environmental stress is difficult to quantify because it is  
614 highly dependent on the type of stress and the genetic diversity of the population. The follow-  
615 ing factors may be particularly important for the quantification of sensitivity: (i) mutation rate  
616 (particularly important for clonal populations); (ii) phenotypic diversity (e.g., apomictic vs. au-  
617 tomictic parthenogenesis); and (iii) ability to respond (adaptively) to environmental conditions  
618 (phenotypic plasticity). All these processes can potentially explain the distribution patterns  
619 of different reproductive strategies and the present study suggests new patterns for empirical  
620 investigation.

## 621 **Acknowledgements**

622 The authors would like to thank Kerstin Johannesson and the anonymous reviewers for their  
623 useful comments on an earlier version of this manuscript. WTAFS, PRJ and KCH were funded  
624 by BaltHealth, which has received funding from BONUS (Art. 185), funded jointly by the EU,  
625 Innovation Fund Denmark (grants 6180-00001B and 6180-00002B), Forschungszentrum Jülich  
626 GmbH, German Federal Ministry of Education and Research (grant FKZ 03F0767A), Academy  
627 of Finland (grant 311966) and Swedish Foundation for Strategic Environmental Research (MIS-  
628 TRA). KH was funded by CeMEB (The Linnaeus Centre for Marine Evolutionary Biology) at  
629 the University of Gothenburg, Sweden.

## 630 **Competing interests**

631 The authors declare that they have no conflict of interest.

## 632 **Author contributions**

633 WTAFS conceived the initial numerical model, wrote the script and ran the simulations. All  
634 authors contributed to the design and implementation of the research, the discussion of the  
635 results and the writing of the manuscript.

## **Literature Cited**

- [1] Tilquin A, Kokko H. What does the geography of parthenogenesis teach us about sex? *Philosophical Transactions of the Royal Society B: Biological Sciences*. 2016;371(1706):20150538. doi:10.1098/rstb.2015.0538.
- [2] Dawson KJ. The advantage of asexual reproduction: when is it two-fold? *Journal of Theoretical Biology*. 1995;176(3):341–347. doi:10.1006/jtbi.1995.0203.
- [3] de Meeûs T, Prugnolle F, Agnew P. Asexual reproduction: genetics and evolutionary aspects. *Cellular and Molecular Life Sciences*. 2007;64(11):1355–1372. doi:10.1007/s00018-007-6515-2.
- [4] Williams GC, Mitton JB. Why reproduce sexually? *Journal of Theoretical Biology*. 1973;39(3):545–554. doi:10.1016/0022-5193(73)90067-2.
- [5] Crow JF. Advantages of sexual reproduction. *Developmental Genetics*. 1994;15(3):205–213. doi:10.1002/dvg.1020150303.
- [6] Crow JF. An advantage of sexual reproduction in a rapidly changing environment. *Journal of Heredity*. 1992;83(3):169–173. doi:10.1093/oxfordjournals.jhered.a111187.
- [7] Bengtsson BO. Genetic variation in organisms with sexual and asexual reproduction. *Journal of Evolutionary Biology*. 2003;16(2):189–199. doi:10.1046/j.1420-9101.2003.00523.x.
- [8] Kellner K, Heinze J. Mechanism of facultative parthenogenesis in the ant *Platythyrea punctata*. *Evolutionary Ecology*. 2011;25(1):77–89. doi:10.1007/s10682-010-9382-5.
- [9] Chang CC, Ting CT, Chang CH, Fang S, Chang HY. The persistence of facultative parthenogenesis in *Drosophila albomicans*. *PLoS ONE*. 2014;9(11):e113275. doi:10.1371/journal.pone.0113275.

- [10] Fournier D, Hellemans S, Hanus R, Roisin Y. Facultative asexual reproduction and genetic diversity of populations in the humivorous termite *Cavitermes tuberosus*. *Proceedings of the Royal Society B: Biological Sciences*. 2016;283(1832):20160196. doi:10.1098/rspb.2016.0196.
- [11] Dudgeon CL, Coulton L, Bone R, Ovenden JR, Thomas S. Switch from sexual to parthenogenetic reproduction in a zebra shark. *Scientific Reports*. 2017;7:40537. doi:10.1038/srep40537.
- [12] Vandel A. La parthénogenèse géographique. Contribution à l'étude biologique et cytologique de la parthénogenèse naturelle. *Bulletin biologique de la France et de la Belgique*. 1928;62:164–281.
- [13] Stieha C, García-Ramos G, Nicholas McLetchie D, Crowley P. Maintenance of the sexes and persistence of a clonal organism in spatially complex metapopulations. *Evolutionary Ecology*. 2017;31(3):363–386. doi:10.1007/s10682-016-9841-8.
- [14] Glesener RR, Tilman D. Sexuality and the components of environmental uncertainty: clues from geographic parthenogenesis in terrestrial animals. *The American Naturalist*. 1978;112(986):659–673. doi:10.1086/283308.
- [15] Bierzychudek P. Patterns in plant parthenogenesis. *Experientia*. 1985;41(10):1255–1264. doi:10.1007/BF01952068.
- [16] Haag CR, Ebert D. A new hypothesis to explain geographic parthenogenesis. *Annales Zoologici Fennici*. 2004;41(4):539–544.
- [17] Johnson SG. Geographic ranges, population structure, and ages of sexual and parthenogenetic snail lineages. *Evolution*. 2006;60(7):1417–1426. doi:10.1111/j.0014-3820.2006.tb01220.x.
- [18] Hörandl E. The complex causality of geographical parthenogenesis. *New Phytologist*. 2006;171(3):525–538. doi:10.1111/j.1469-8137.2006.01769.x.
- [19] Kearney M. Hybridization, glaciation and geographical parthenogenesis. *Trends in Ecology & Evolution*. 2005;20(9):495–502. doi:10.1016/j.tree.2005.06.005.

- [20] Peck JR, Yearsley JM, Waxman D. Explaining the geographic distributions of sexual and asexual populations. *Nature*. 1998;391(6670):889–892. doi:10.1038/36099.
- [21] Law JH, Crespi BJ. The evolution of geographic parthenogenesis in *Timema* walking-sticks. *Molecular Ecology*. 2002;11(8):1471–1489. doi:10.1046/j.1365-294x.2002.01547.x.
- [22] Hiraoka M, Higa M. Novel distribution pattern between coexisting sexual and obligate asexual variants of the true estuarine macroalga *Ulva prolifera*. *Ecology and Evolution*. 2016;6(11):3658–3671. doi:10.1002/ece3.2149.
- [23] Gabrielsen TM, Brochmann C, Rueness J. The Baltic Sea as a model system for studying postglacial colonization and ecological differentiation, exemplified by the red alga *Ceramium tenuicorne*. *Molecular Ecology*. 2002;11(10):2083–2095. doi:10.1046/j.1365-294X.2002.01601.x.
- [24] Tatarenkov A, Bergström L, Jönsson RB, Serrão EA, Kautsky L, Johannesson K. Intriguing asexual life in marginal populations of the brown seaweed *Fucus vesiculosus*. *Molecular Ecology*. 2005;14(2):647–651. doi:10.1111/j.1365-294X.2005.02425.x.
- [25] Pereyra RT, Bergström L, Kautsky L, Johannesson K. Rapid speciation in a newly opened postglacial marine environment, the Baltic Sea. *BMC Evolutionary Biology*. 2009;9:70. doi:10.1186/1471-2148-9-70.
- [26] Johannesson K, Johansson D, Larsson KH, Huenchunir CJ, Perus J, Forslund H, et al. Frequent clonality in fucoids (*Fucus radicans* and *Fucus vesiculosus*; Fucales, Phaeophyceae) in the Baltic Sea. *Journal of Phycology*. 2011;47(5):990–998. doi:10.1111/j.1529-8817.2011.01032.x.
- [27] Rafajlović M, Kleinhans D, Gulliksson C, Fries J, Johansson D, Ardehed A, et al. Neutral processes forming large clones during colonization of new areas. *Journal of Evolutionary Biology*. 2017;30(8):1544–1560. doi:10.1111/jeb.13124.
- [28] Hojsgaard D, Hörandl E. The rise of apomixis in natural plant populations. *Frontiers in Plant Science*. 2019;10. doi:10.3389/fpls.2019.00358.



- [29] Kazuki S, Tojo K. Automictic parthenogenesis of a geographically parthenogenetic mayfly, *Ephoron shigae* (Insecta: Ephemeroptera, Polymitaecidae). *Biological Journal of the Linnean Society*. 2010;99(2):335–343. doi:10.1111/j.1095-8312.2009.01351.x.
- [30] Cosendai AC, Wagner J, Ladinig U, Rosche C, Hörandl E. Geographical parthenogenesis and population genetic structure in the alpine species *Ranunculus kuepferi* (Ranunculaceae). *Heredity*. 2013;110(6):560–569. doi:10.1038/hdy.2013.1.
- [31] Menken SBJ, Smit E, Nijs HJCMD. Genetical population structure in plants: gene flow between diploid sexual and triploid asexual dandelions (*Taraxacum* section Ruderalia). *Evolution; International Journal of Organic Evolution*. 1995;49(6):1108–1118. doi:10.1111/j.1558-5646.1995.tb04437.x.
- [32] Dijk PJv. Ecological and evolutionary opportunities of apomixis: insights from *Taraxacum* and *Chondrilla*. *Philosophical Transactions of the Royal Society of London Series B: Biological Sciences*. 2003;358(1434):1113–1121. doi:10.1098/rstb.2003.1302.
- [33] Tucker AE, Ackerman MS, Eads BD, Xu S, Lynch M. Population-genomic insights into the evolutionary origin and fate of obligately asexual *Daphnia pulex*. *Proceedings of the National Academy of Sciences of the United States of America*. 2013;110(39):15740–15745. doi:10.1073/pnas.1313388110.
- [34] Lehto MP, Haag CR. Ecological differentiation between coexisting sexual and asexual strains of *Daphnia pulex*. *The Journal of Animal Ecology*. 2010;79(6):1241–1250. doi:10.1111/j.1365-2656.2010.01726.x.
- [35] Caron V, Ede FJ, Sunnucks P. Unravelling the paradox of loss of genetic variation during invasion: superclones may explain the success of a clonal invader. *PLoS ONE*. 2014;9(6). doi:10.1371/journal.pone.0097744.
- [36] Jensen LH, Enghoff H, Frydenberg J, Parker ED. Genetic diversity and the phylogeography of parthenogenesis: comparing bisexual and thelytokous populations of *Nemasoma varicorne* (Diplopoda: Nemasomatidae) in Denmark. *Heredity*. 2002;136(3):184–194. doi:10.1034/j.1601-5223.2002.1360302.x.

- [37] Burns M, Hedin M, Tsurusaki N. Population genomics and geographical parthenogenesis in Japanese harvestmen (Opiliones, Sclerosomatidae, *Leiobunum*). *Ecology and Evolution*. 2018;8(1):36–52. doi:10.1002/ece3.3605.
- [38] Hörandl E. Species concepts in agamic complexes: applications in the *Ranunculus auricomus* complex and general perspectives. *Folia Geobotanica*. 1998;33(3):335–348. doi:10.1007/BF03216210.
- [39] Kearney M, Blacket MJ, Strasburg JL, Moritz C. Waves of parthenogenesis in the desert: evidence for the parallel loss of sex in a grasshopper and a gecko from Australia. *Molecular Ecology*. 2006;15(7):1743–1748. doi:10.1111/j.1365-294X.2006.02898.x.
- [40] Burke NW, Bonduriansky R. The geography of sex: sexual conflict, environmental gradients and local loss of sex in facultatively parthenogenetic animals. *Philosophical Transactions of the Royal Society B: Biological Sciences*. 2018;373(1757):20170422. doi:10.1098/rstb.2017.0422.
- [41] Song Y, Scheu S, Drossel B. Geographic parthenogenesis in a consumer-resource model for sexual reproduction. *Journal of Theoretical Biology*. 2011;273(1):55–62. doi:10.1016/j.jtbi.2010.12.020.
- [42] Suomalainen E. Parthenogenesis in animals. In: Demerec M, editor. *Advances in Genetics*. vol. 3. Academic Press; 1950. p. 193–253. Available from: <http://www.sciencedirect.com/science/article/pii/S0065266008600863>.
- [43] Avise JC. Evolutionary perspectives on clonal reproduction in vertebrate animals. *Proceedings of the National Academy of Sciences*. 2015;112(29):8867–8873. doi:10.1073/pnas.1501820112.
- [44] Allee WCWC. *Animal aggregations, a study in general sociology*. Chicago : The University of Chicago Press; 1931. Available from: <http://archive.org/details/animalaggregatio00alle>.
- [45] Stephens PA, Sutherland WJ, Freckleton RP. What is the Allee effect? *Oikos*. 1999;87(1):185–190. doi:10.2307/3547011.

- [46] Møller AP, Legendre S. Allee effect, sexual selection and demographic stochasticity. *Oikos*. 2001;92(1):27–34. doi:10.1034/j.1600-0706.2001.920104.x.
- [47] R Core Team. R: a language and environment for statistical computing; 2017. Available from: <https://www.R-project.org/>.
- [48] Vrijenhoek RC. Factors affecting clonal diversity and coexistence. *American Zoologist*. 1979;19(3):787–797.
- [49] Pound GE, Cox SJ, Doncaster CP. The accumulation of deleterious mutations within the frozen niche variation hypothesis. *Journal of Evolutionary Biology*. 2004;17(3):651–662. doi:10.1111/j.1420-9101.2003.00690.x.
- [50] Holt RD, Keitt TH. Alternative causes for range limits: a metapopulation perspective. *Ecology Letters*. 2000;3(1):41–47. doi:10.1046/j.1461-0248.2000.00116.x.
- [51] Holt RD, Barfield M. Theoretical perspectives on the statics and dynamics of species' borders in patchy environments. *The American naturalist*. 2011;178(Suppl 1):S6–25. doi:10.1086/661784.
- [52] Dorken ME, Eckert CG. Severely reduced sexual reproduction in northern populations of a clonal plant, *Decodon verticillatus* (Lythraceae). *Journal of Ecology*. 2001;89(3):339–350. doi:10.1046/j.1365-2745.2001.00558.x.
- [53] Courchamp F, Clutton-Brock T, Grenfell B. Inverse density dependence and the Allee effect. *Trends in Ecology & Evolution*. 1999;14(10):405–410. doi:10.1016/S0169-5347(99)01683-3.
- [54] Wells H, Strauss EG, Rutter MA, Wells PH. Mate location, population growth and species extinction. *Biological Conservation*. 1998;86(3):317–324. doi:10.1016/S0006-3207(98)00032-9.
- [55] Groom M. Allee effects limit population viability of an annual plant. *The American Naturalist*. 1998;151(6):487–496. doi:10.1086/286135.
- [56] Lamont BB, Klinkhamer PGL, Witkowski ETF. Population fragmentation may reduce

- fertility to zero in *Banksia goodii* – a demonstration of the Allee effect. *Oecologia*. 1993;94(3):446–450. doi:10.1007/BF00317122.
- [57] Kuussaari M, Saccheri I, Camara M, Hanski I. Allee effect and population dynamics in the Glanville fritillary butterfly. *Oikos*. 1998;82(2):384–392. doi:10.2307/3546980.
- [58] Perälä T, Kuparinen A. Detection of Allee effects in marine fishes: analytical biases generated by data availability and model selection. *Proceedings of the Royal Society B: Biological Sciences*. 2017;284(1861):20171284. doi:10.1098/rspb.2017.1284.
- [59] Kaul RB, Kramer AM, Dobbs FC, Drake JM. Experimental demonstration of an Allee effect in microbial populations. *Biology Letters*. 2016;12(4):20160070. doi:10.1098/rsbl.2016.0070.
- [60] Veit RR, Lewis MA. Dispersal, population growth, and the Allee effect: dynamics of the house finch invasion of Eastern North America. *The American Naturalist*. 1996;148(2):255–274.
- [61] Lewis MA, Kareiva P. Allee dynamics and the spread of invading organisms. *Theoretical Population Biology*. 1993;43(2):141–158. doi:10.1006/tpbi.1993.1007.
- [62] Roy M, Harding K, Holt RD. Generalizing Levins metapopulation model in explicit space: models of intermediate complexity. *Journal of Theoretical Biology*. 2008;255(1):152–161. doi:10.1016/j.jtbi.2008.07.022.
- [63] Wang G, Liang XG, Wang FZ. The competitive dynamics of populations subject to an Allee effect. *Ecological Modelling*. 1999;124(2):183–192. doi:10.1016/S0304-3800(99)00160-X.
- [64] Fowler MS, Ruxton GD. Population dynamic consequences of Allee effects. *Journal of Theoretical Biology*. 2002;215(1):39–46. doi:10.1006/jtbi.2001.2486.
- [65] Amarasekare P. Allee effects in metapopulation dynamics. *The American Naturalist*. 1998;152(2):298–302. doi:10.1086/286169.
- [66] Harding KC, Begon M, Eriksson A, Wennberg B. Increased migration in host-pathogen metapopulations can cause host extinction. *Journal of Theoretical Biology*. 2012;298:1–7. doi:10.1016/j.jtbi.2011.12.009.

- [67] Forsman A. Effects of genotypic and phenotypic variation on establishment are important for conservation, invasion, and infection biology. *Proceedings of the National Academy of Sciences*. 2014;111(1):302–307. doi:10.1073/pnas.1317745111.
- [68] Agashe D. The stabilizing effect of intraspecific genetic variation on population dynamics in novel and ancestral habitats. *The American Naturalist*. 2009;174(2):255–267. doi:10.1086/600085.
- [69] Prati D, Peintinger M, Fischer M. Genetic composition, genetic diversity and small-scale environmental variation matter for the experimental reintroduction of a rare plant. *Journal of Plant Ecology*. 2016;9(6):805–813. doi:10.1093/jpe/rtv067.
- [70] Eckert CG, Samis KE, Loughheed SC. Genetic variation across species' geographical ranges: the central-marginal hypothesis and beyond. *Molecular Ecology*. 2008;17(5):1170–1188. doi:10.1111/j.1365-294X.2007.03659.x.
- [71] Orr HA, Unckless RL. Population extinction and the genetics of adaptation. *The American Naturalist*. 2008;172(2):160–169. doi:10.1086/589460.
- [72] Bell G. Evolutionary rescue and the limits of adaptation. *Philosophical Transactions of the Royal Society B: Biological Sciences*. 2013;368(1610). doi:10.1098/rstb.2012.0080.
- [73] Uecker H. Evolutionary rescue in randomly mating, selfing, and clonal populations. *Evolution*. 2017;71(4):845–858. doi:10.1111/evo.13191.
- [74] Johannesson K, Smolarz K, Grahn M, André C. The future of Baltic Sea populations: local extinction or evolutionary rescue? *Ambio*. 2011;40(2):179–190. doi:10.1007/s13280-010-0129-x.

## Supplementary Information

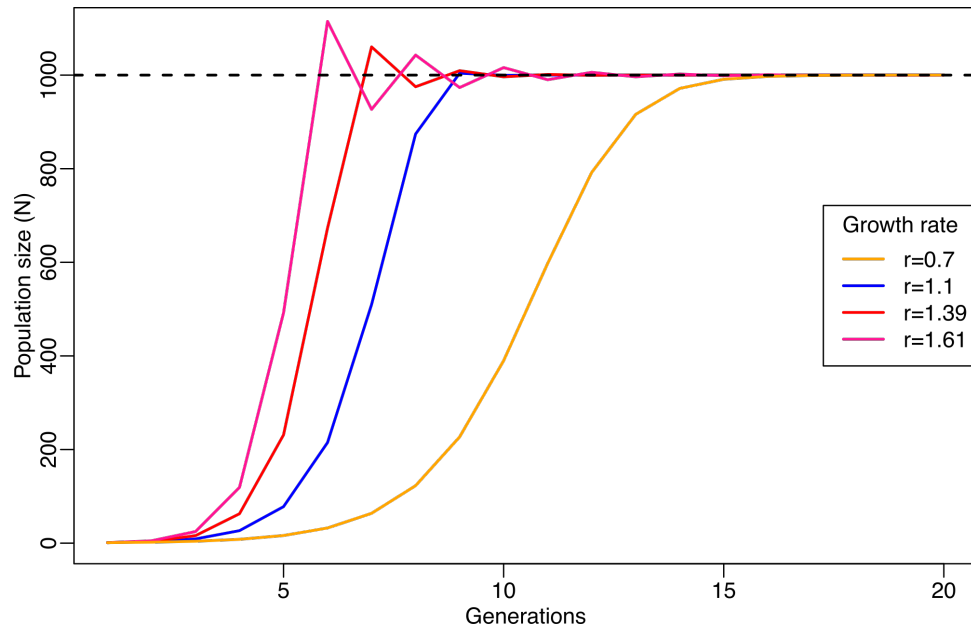

Figure S1: Logistic growth for different population growth rates. The maximum growth rate was set to  $r_{max} = 1.1$  in all simulations.

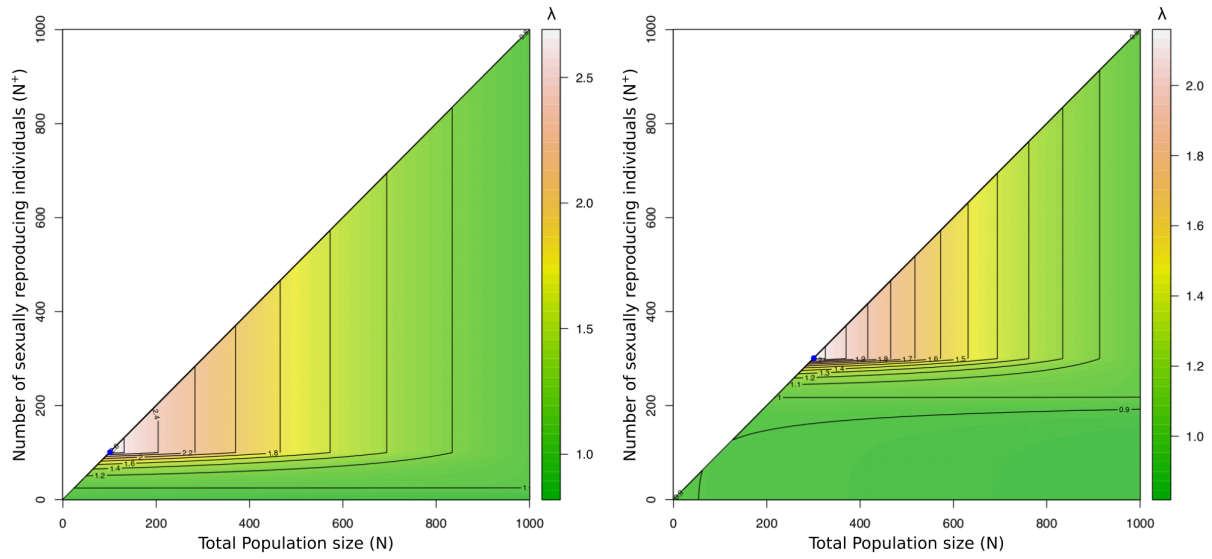

Figure S2: Density-dependent *per capita* growth rate ( $\lambda$ ) of the sexually reproducing population under weak ( $\alpha = 0.3$  and  $\beta = 0.1$ ; left) and strong ( $\alpha = 0.1$  and  $\beta = 0.3$ ; right) Allee effects. Parameter values used across all simulations:  $r_{min} = -0.1$ ,  $r_{max} = 1.1$  and  $K_{pN} = 1000$ .

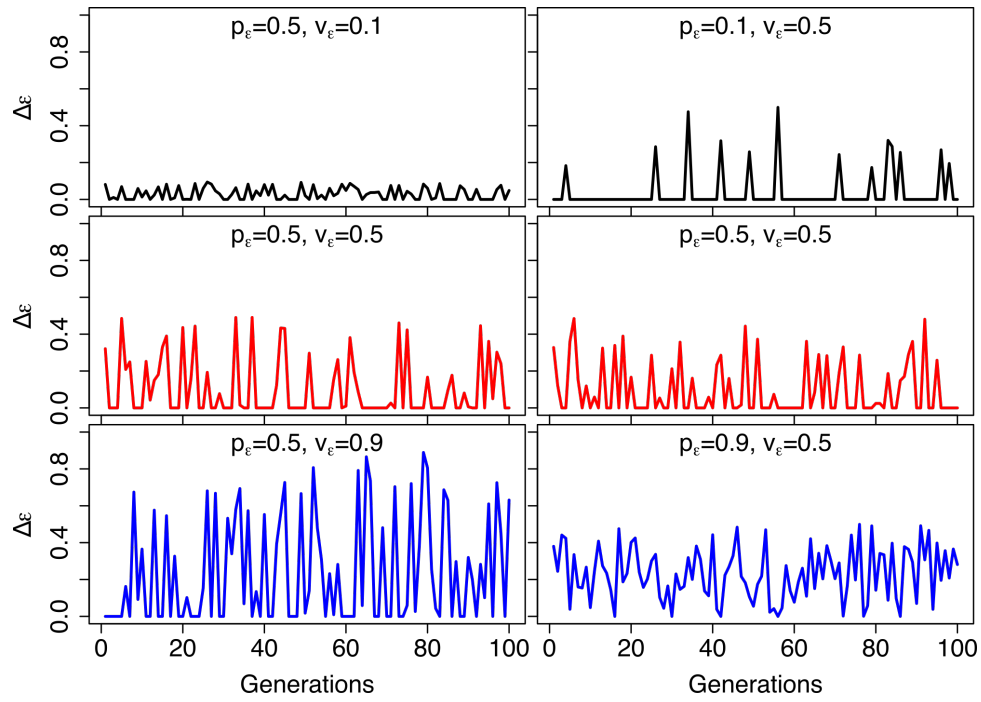

Figure S3: Examples of environmental dynamics showing environmental stress levels ( $\Delta\epsilon$ ) for different probabilities of stress occurrence ( $p_\epsilon$ ) and maximum stress level ( $v_\epsilon$ ) throughout time.



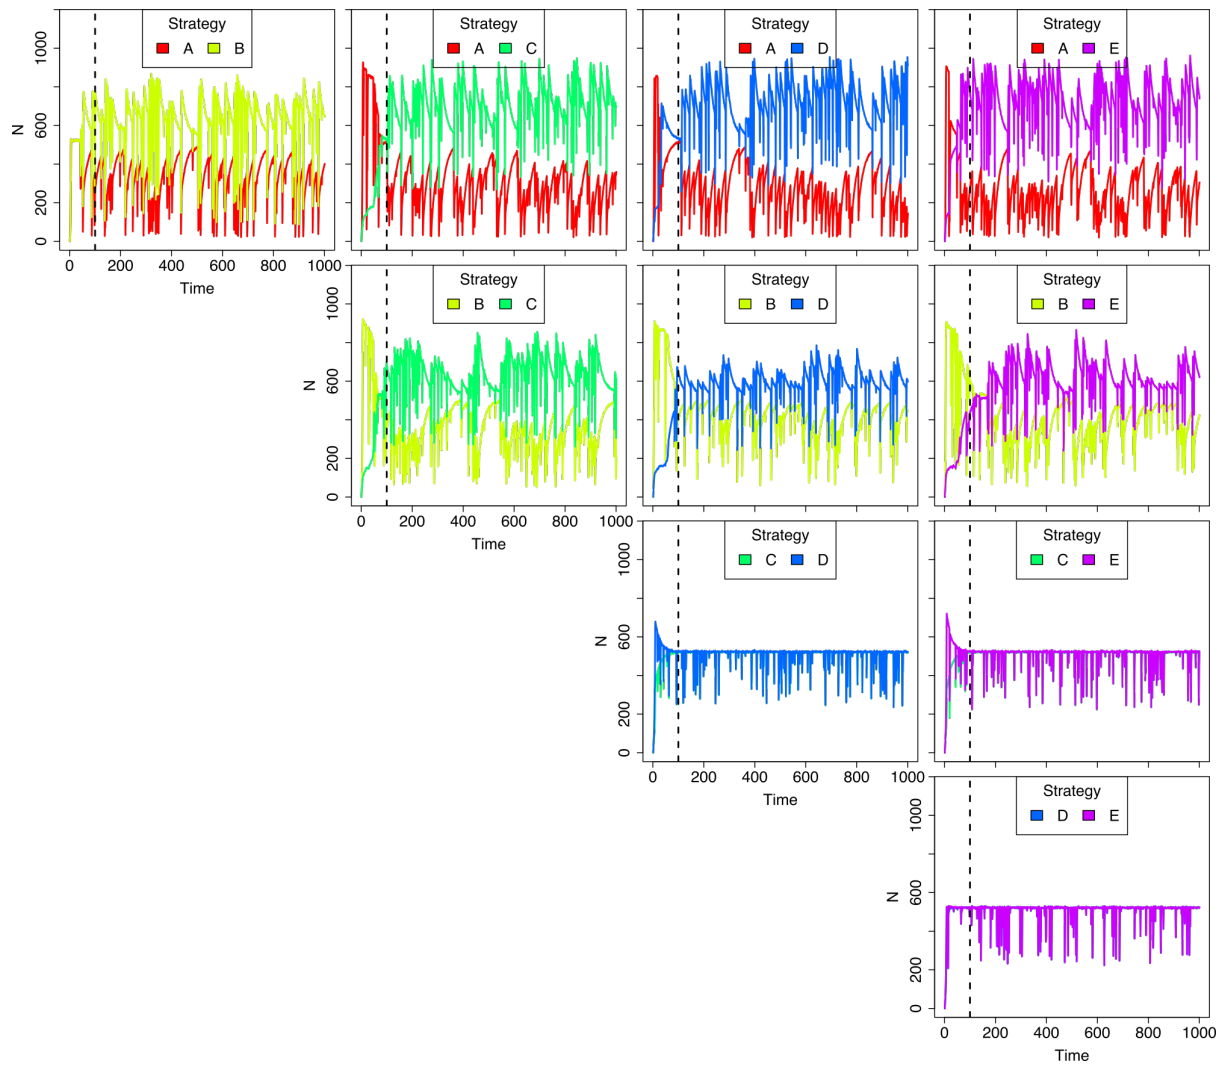

Figure S4: Pairwise competition between reproductive strategies and population dynamics during invasion of a marginal habitat (North patch) under high environmental stress ( $p_{\epsilon}^{pN} = 0.1$  and  $v_{\epsilon}^{pN} = 0.9$ ), with sexual strategies exposed to a relatively strong Allee effect ( $\alpha = 0.1$  and  $\beta = 0.3$ ). Dashed lines indicate generation 100. Sensitivity values:  $\phi^A = 1.0$ ,  $\phi^B = 0.75$ ,  $\phi^C = 0.5$ .

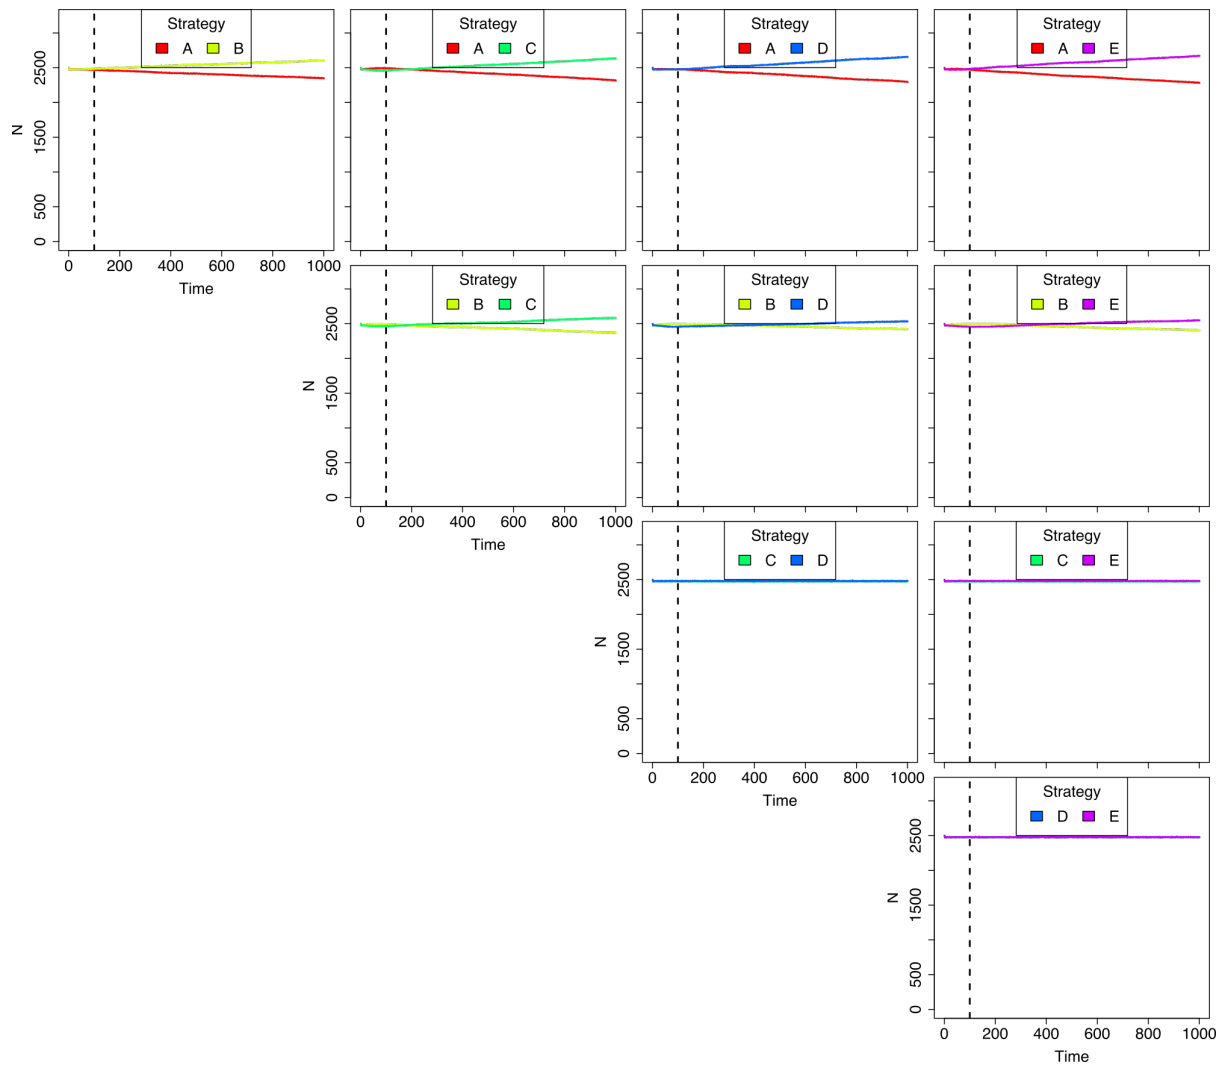

Figure S5: Pairwise competition between reproductive strategies and population dynamics in the ancestral population (South patch) during invasion of a marginal habitat (North patch) under high environmental stress ( $p_{\epsilon}^{pN} = 0.1$  and  $v_{\epsilon}^{pN} = 0.9$ ), with sexual strategies exposed to a relatively strong Allee effect ( $\alpha = 0.1$  and  $\beta = 0.3$ ). Dashed lines indicate generation 100. Sensitivity values:  $\phi^A = 1.0$ ,  $\phi^B = 0.75$ ,  $\phi^C = 0.5$ .

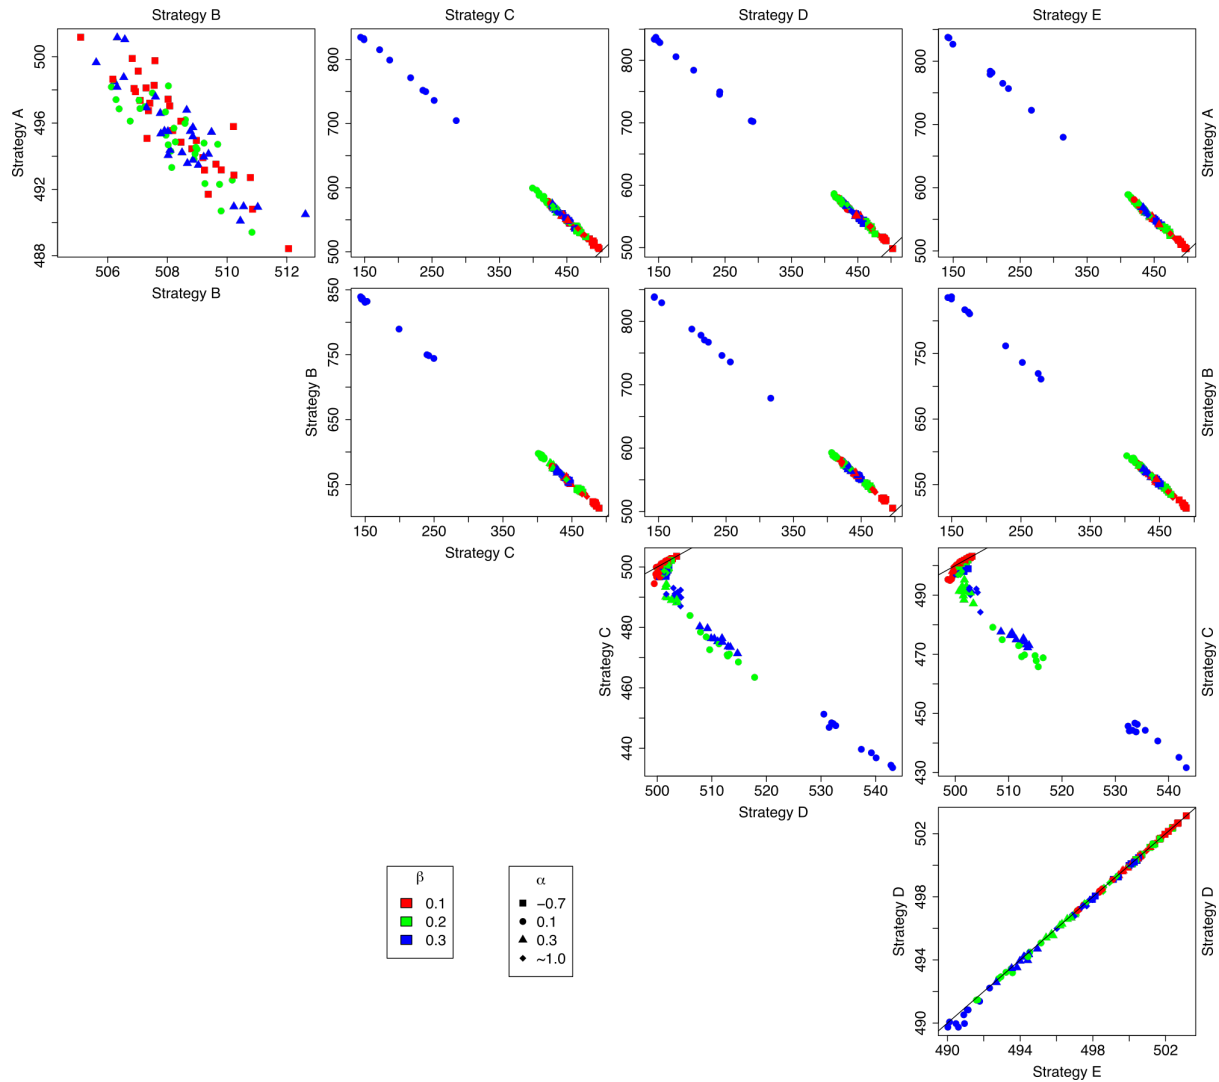

Figure S6: Pairwise competition between different reproductive strategies during invasion of a marginal habitat (North path) under low environmental stress ( $p_e^{pN} = 0.1$  and  $v_e^{pN} = 0.1$ ), with sexual strategies exposed to a variety of Allee effect magnitudes ( $\alpha$  and  $\beta$ ). Axes represent the short-term temporal mean population sizes of competing strategies. Diagonal lines indicate identical temporal mean population sizes of competing reproductive strategies and therefore equivalent ecological successes. Sensitivity values:  $\phi^A = 1.0$ ,  $\phi^B = 0.75$ ,  $\phi^C = 0.5$ .

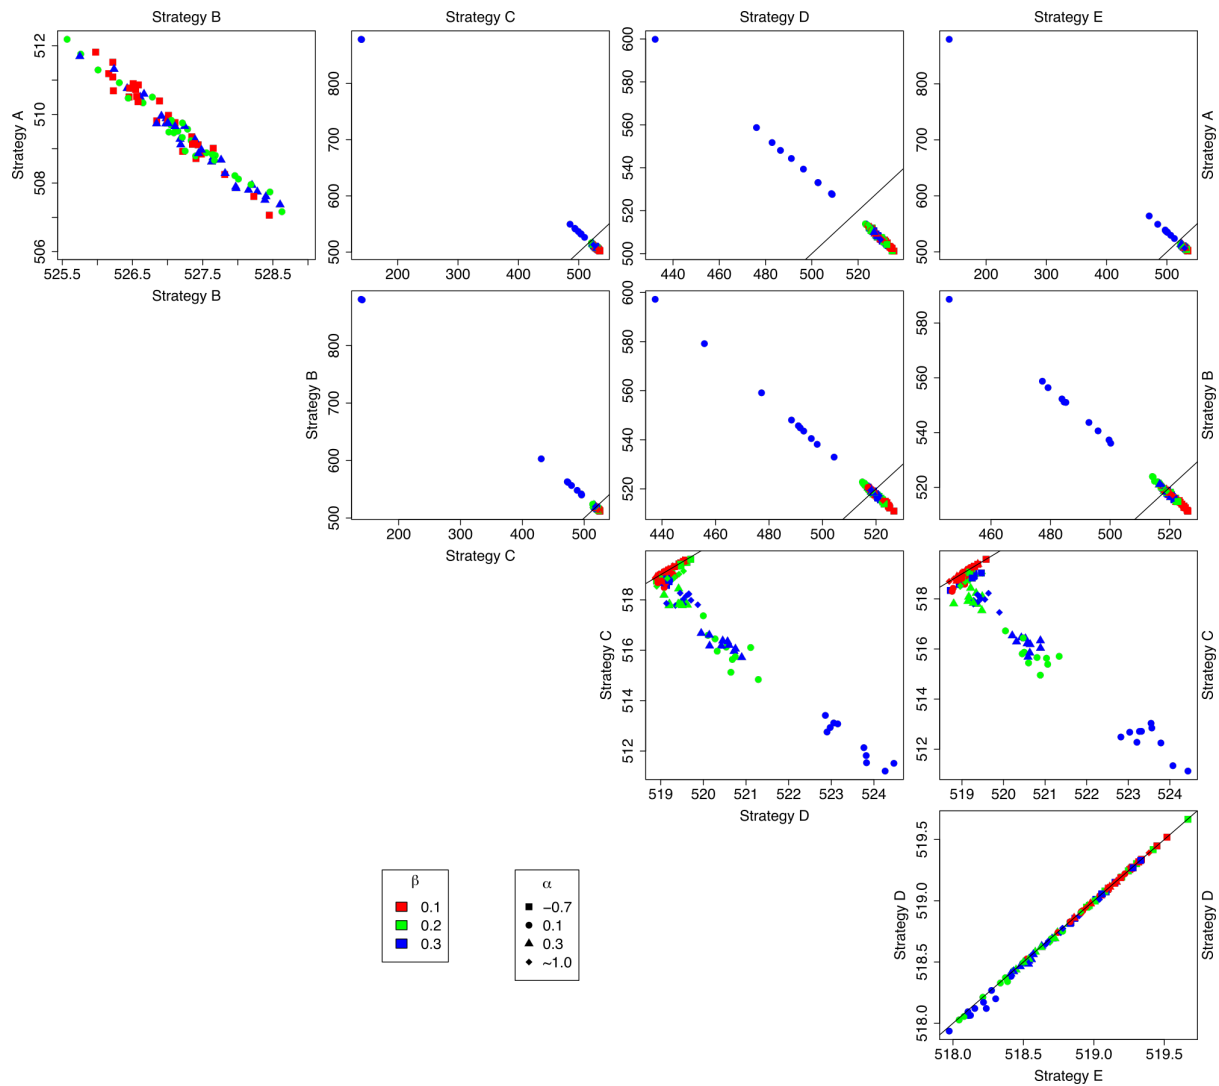

Figure S7: Pairwise competition between different reproductive strategies during invasion of a marginal habitat (North path) under low environmental stress ( $p_{\epsilon}^{pN} = 0.1$  and  $v_{\epsilon}^{pN} = 0.1$ ), with sexual strategies exposed to a variety of Allee effect magnitudes ( $\alpha$  and  $\beta$ ). Axes represent the long-term temporal mean population sizes of competing strategies. Diagonal lines indicate identical temporal mean population sizes of competing reproductive strategies and therefore equivalent ecological successes. Sensitivity values:  $\phi^A = 1.0$ ,  $\phi^B = 0.75$ ,  $\phi^C = 0.5$ .

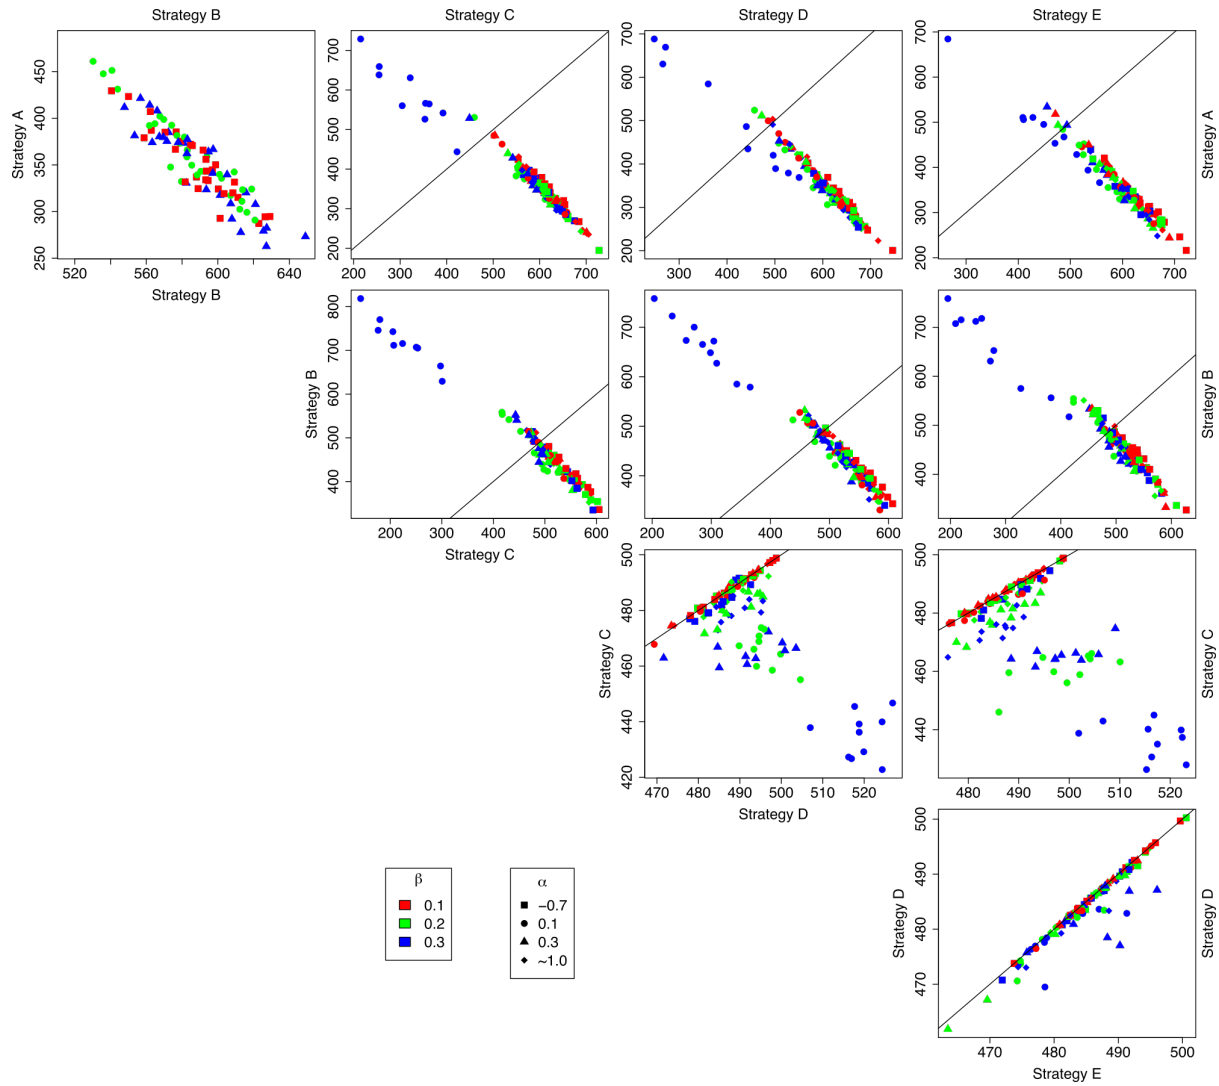

Figure S8: Pairwise competition between different reproductive strategies during invasion of a marginal habitat (North patch) under high environmental stress ( $p_\epsilon^{p^N} = 0.1$  and  $v_\epsilon^{p^N} = 0.9$ ), with sexual strategies exposed to a variety of Allee effect magnitudes ( $\alpha$  and  $\beta$ ). Axes represent the short-term temporal mean population sizes of competing strategies. Diagonal lines indicate identical temporal mean population sizes of competing reproductive strategies and therefore equivalent ecological successes. Sensitivity values:  $\phi^A = 1.0$ ,  $\phi^B = 0.75$ ,  $\phi^C = 0.5$ .

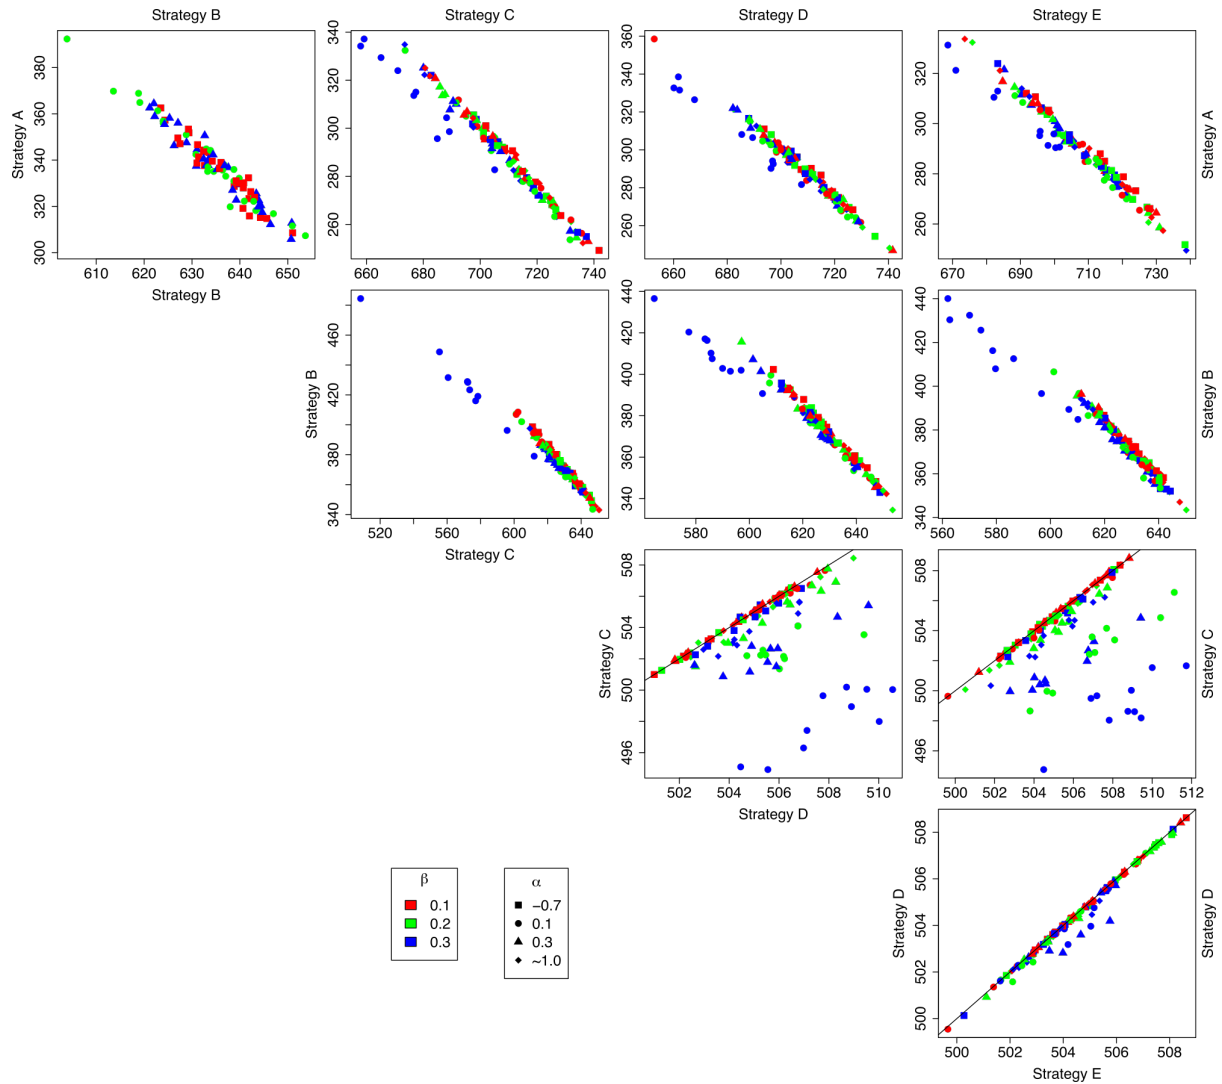

Figure S9: Pairwise competition between different reproductive strategies during invasion of a marginal habitat (North patch) under high environmental stress ( $p_\epsilon^{pN} = 0.1$  and  $v_\epsilon^{pN} = 0.9$ ), with sexual strategies exposed to a variety of Allee effect magnitudes ( $\alpha$  and  $\beta$ ). Axes represent the long-term temporal mean population sizes of competing strategies. Diagonal lines indicate identical temporal mean population sizes of competing reproductive strategies and therefore equivalent ecological successes. Sensitivity values:  $\phi^A = 1.0$ ,  $\phi^B = 0.75$ ,  $\phi^C = 0.5$ .

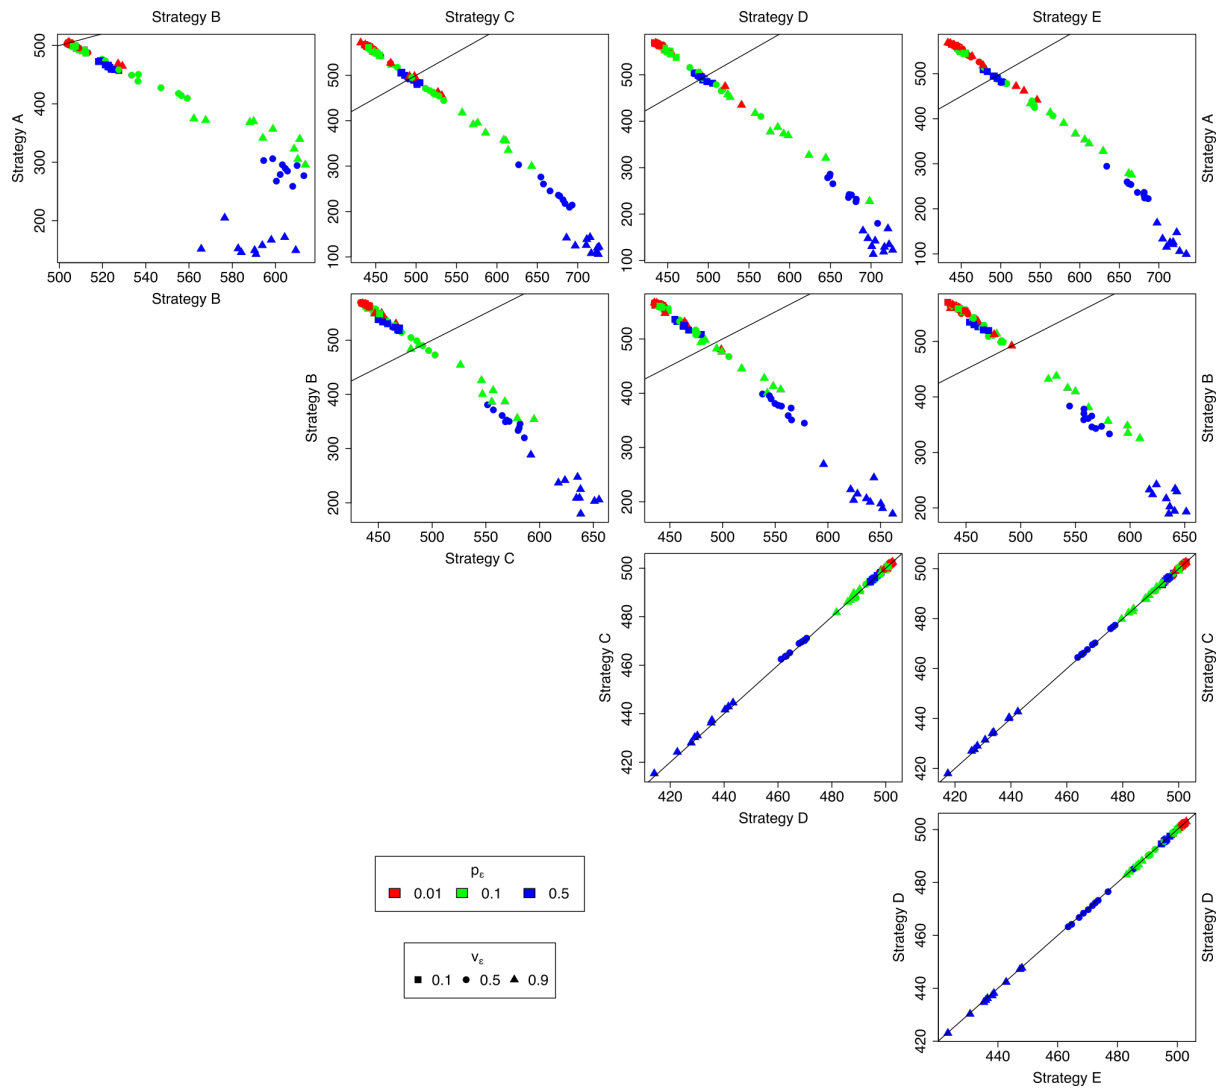

Figure S10: Pairwise competition between different reproductive strategies during invasion of a marginal habitat (North patch) under different probabilities of occurrence of stressful conditions ( $p_\epsilon^{PN}$ ) and maximum levels of stress ( $v_\epsilon^{PN}$ ), with sexual strategies exposed to a relatively weak Allee effect ( $\alpha = 0.3$  and  $\beta = 0.1$ ). Axes represent the short-term temporal mean population sizes of competing strategies. Diagonal lines indicate identical temporal mean population sizes of competing reproductive strategies and therefore equivalent ecological successes. Sensitivity values:  $\phi^A = 1.0$ ,  $\phi^B = 0.75$ ,  $\phi^C = 0.5$ .

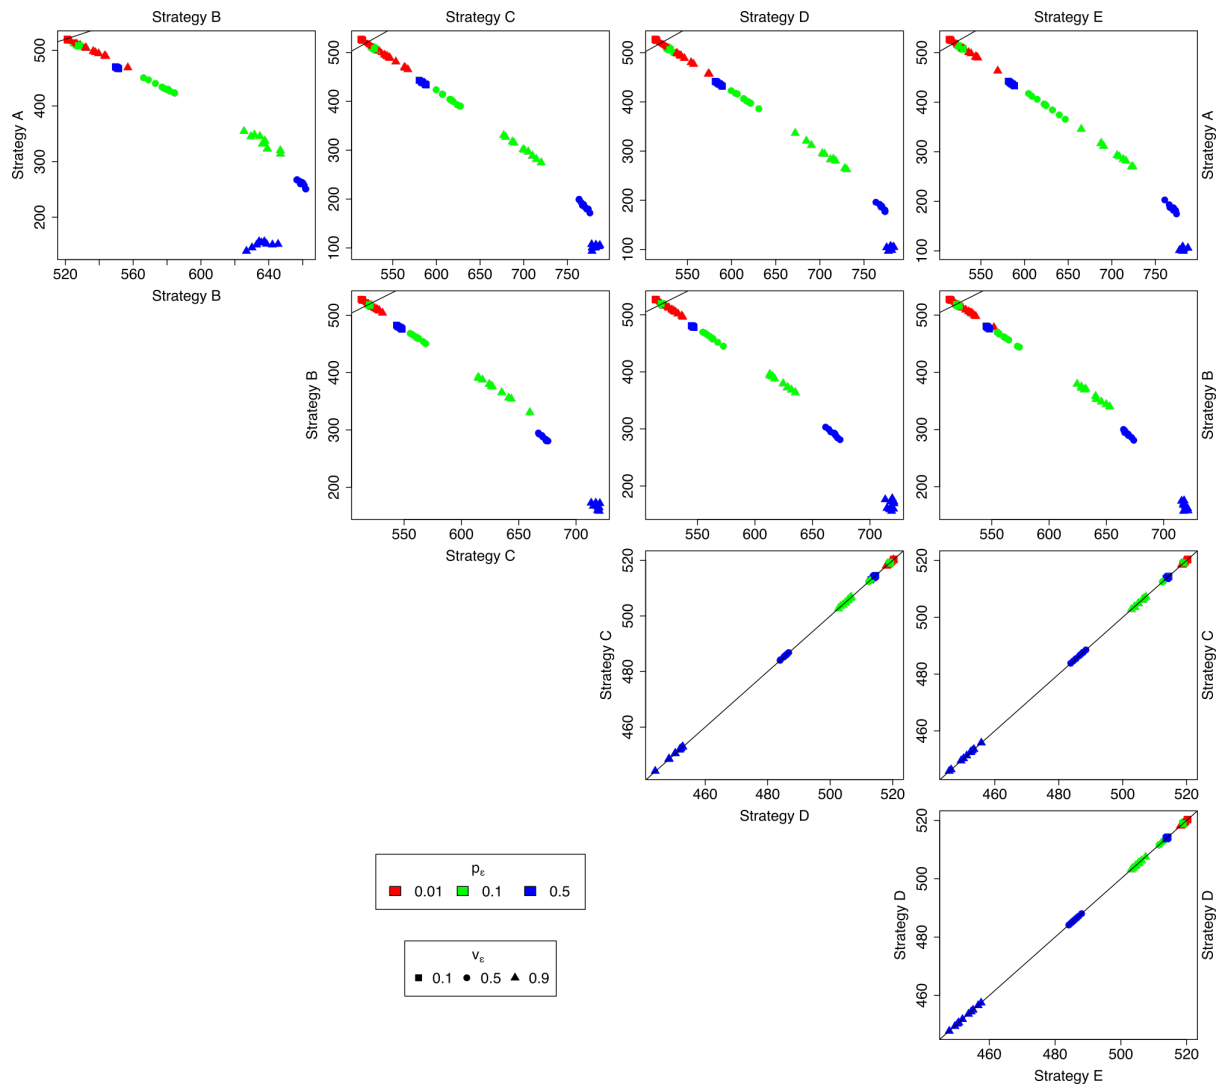

Figure S11: Pairwise competition between different reproductive strategies during invasion of a marginal habitat (North patch) under different probabilities of occurrence of stressful conditions ( $p_\epsilon^{pN}$ ) and maximum levels of stress ( $v_\epsilon^{pN}$ ), with sexual strategies exposed to a relatively weak Allee effect ( $\alpha = 0.3$  and  $\beta = 0.1$ ). Axes represent the long-term temporal mean population sizes of competing strategies. Diagonal lines indicate identical temporal mean population sizes of competing reproductive strategies and therefore equivalent ecological successes. Sensitivity values:  $\phi^A = 1.0$ ,  $\phi^B = 0.75$ ,  $\phi^C = 0.5$ .



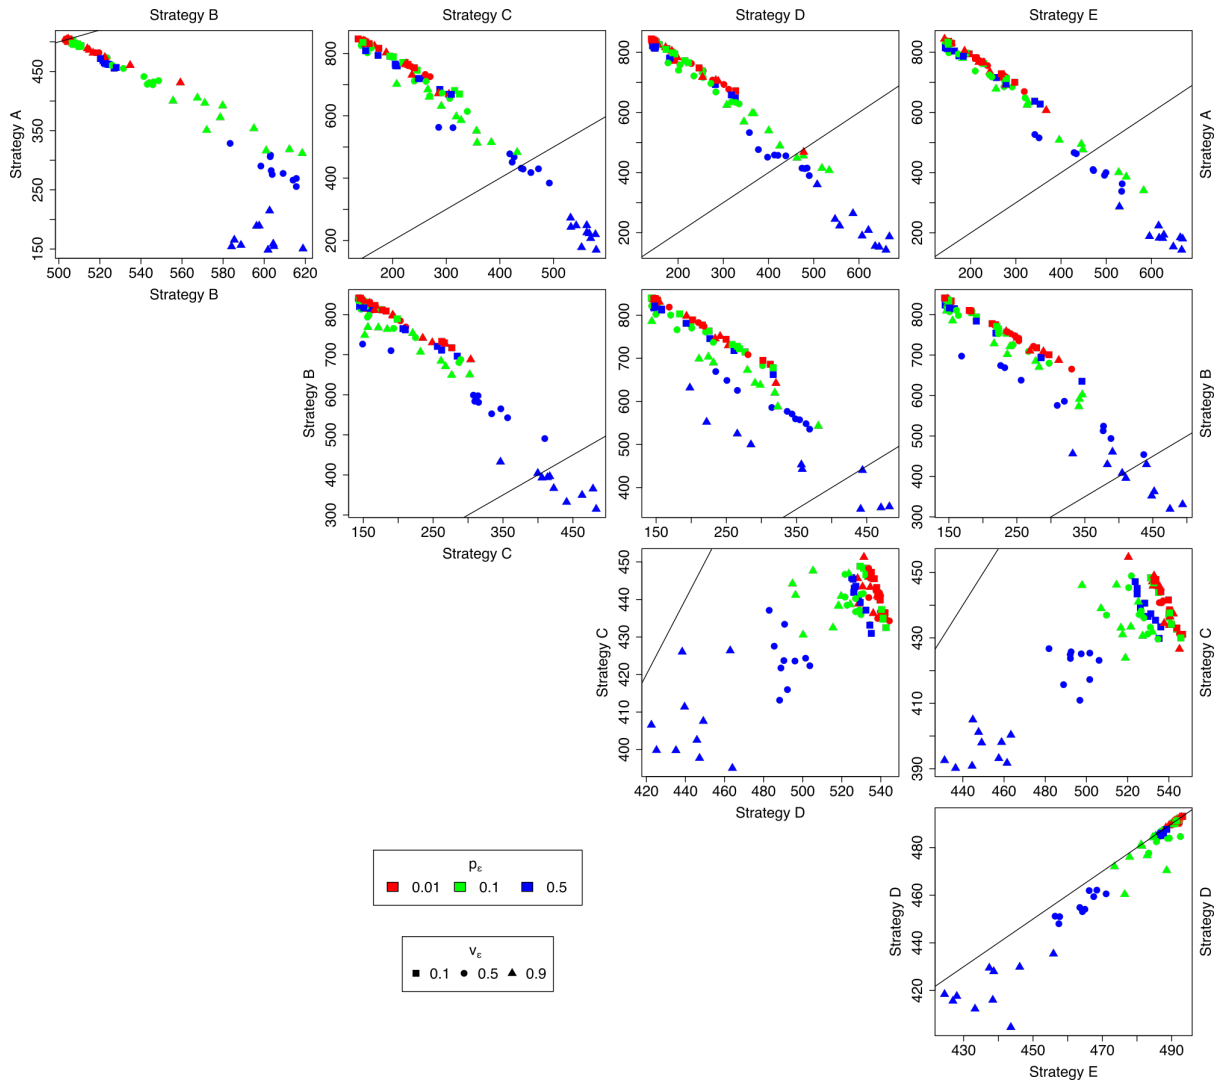

Figure S12: Pairwise competition between different reproductive strategies during invasion of a marginal habitat (North patch) under different probabilities of occurrence of stressful conditions ( $p_\epsilon^{pN}$ ) and maximum levels of stress ( $v_\epsilon^{pN}$ ), with sexual strategies exposed to a relatively strong Allee effect ( $\alpha = 0.1$  and  $\beta = 0.3$ ). Axes represent the short-term temporal mean population sizes of competing strategies. Diagonal lines indicate identical temporal mean population sizes of competing reproductive strategies and therefore equivalent ecological successes. Sensitivity values:  $\phi^A = 1.0$ ,  $\phi^B = 0.75$ ,  $\phi^C = 0.5$ .

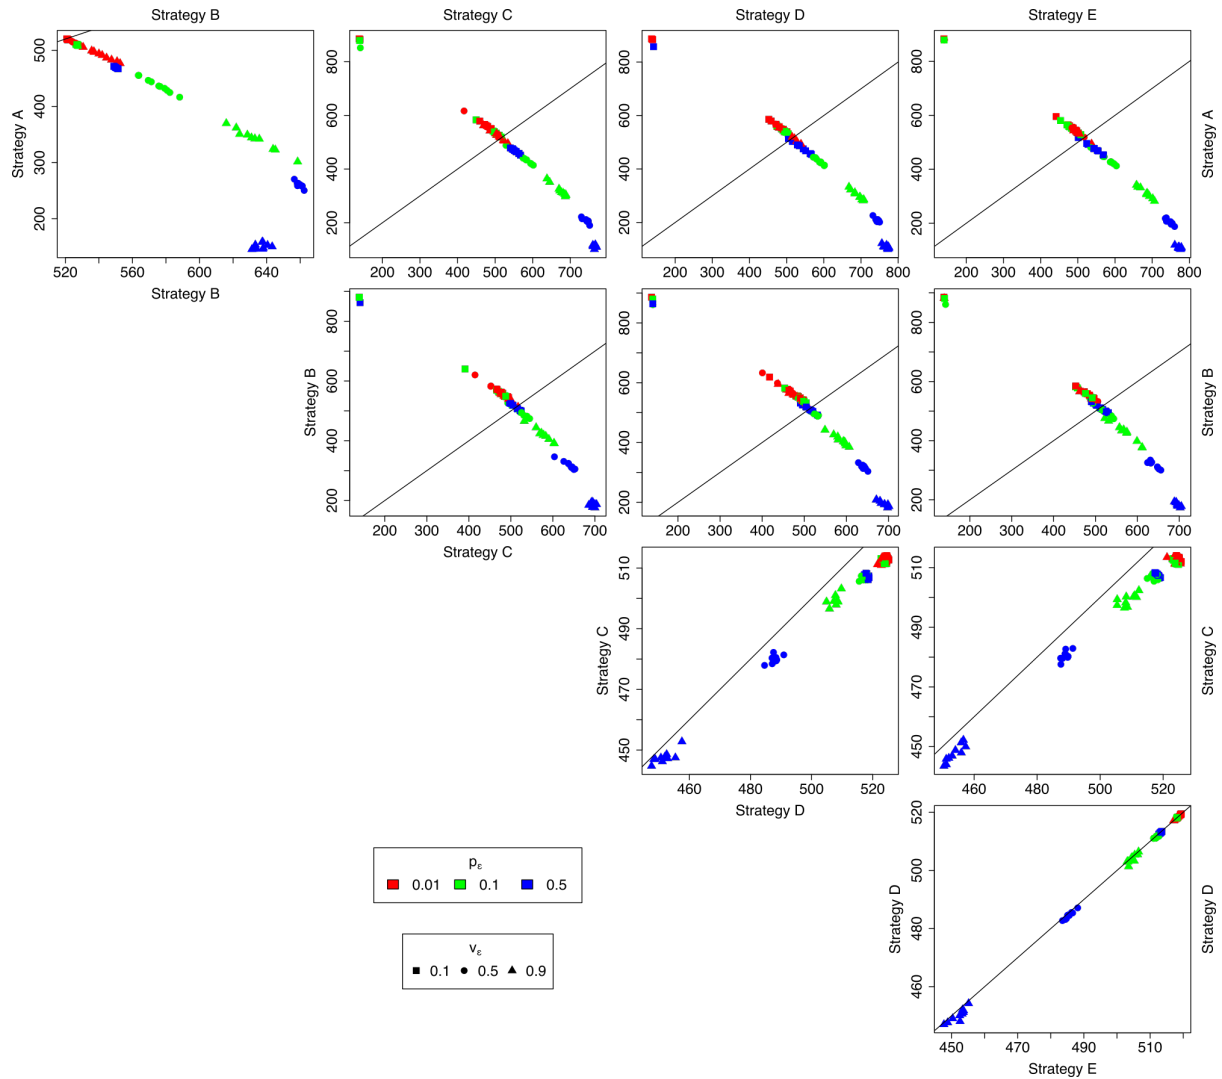

Figure S13: Pairwise competition between different reproductive strategies during invasion of a marginal habitat (North patch) under different probabilities of occurrence of stressful conditions ( $p_\epsilon^{pN}$ ) and maximum levels of stress ( $v_\epsilon^{pN}$ ), with sexual strategies exposed to a relatively strong Allee effect ( $\alpha = 0.1$  and  $\beta = 0.3$ ). Axes represent the long-term temporal mean population sizes of competing strategies. Diagonal lines indicate identical temporal mean population sizes of competing reproductive strategies and therefore equivalent ecological successes. Sensitivity values:  $\phi^A = 1.0$ ,  $\phi^B = 0.75$ ,  $\phi^C = 0.5$ .

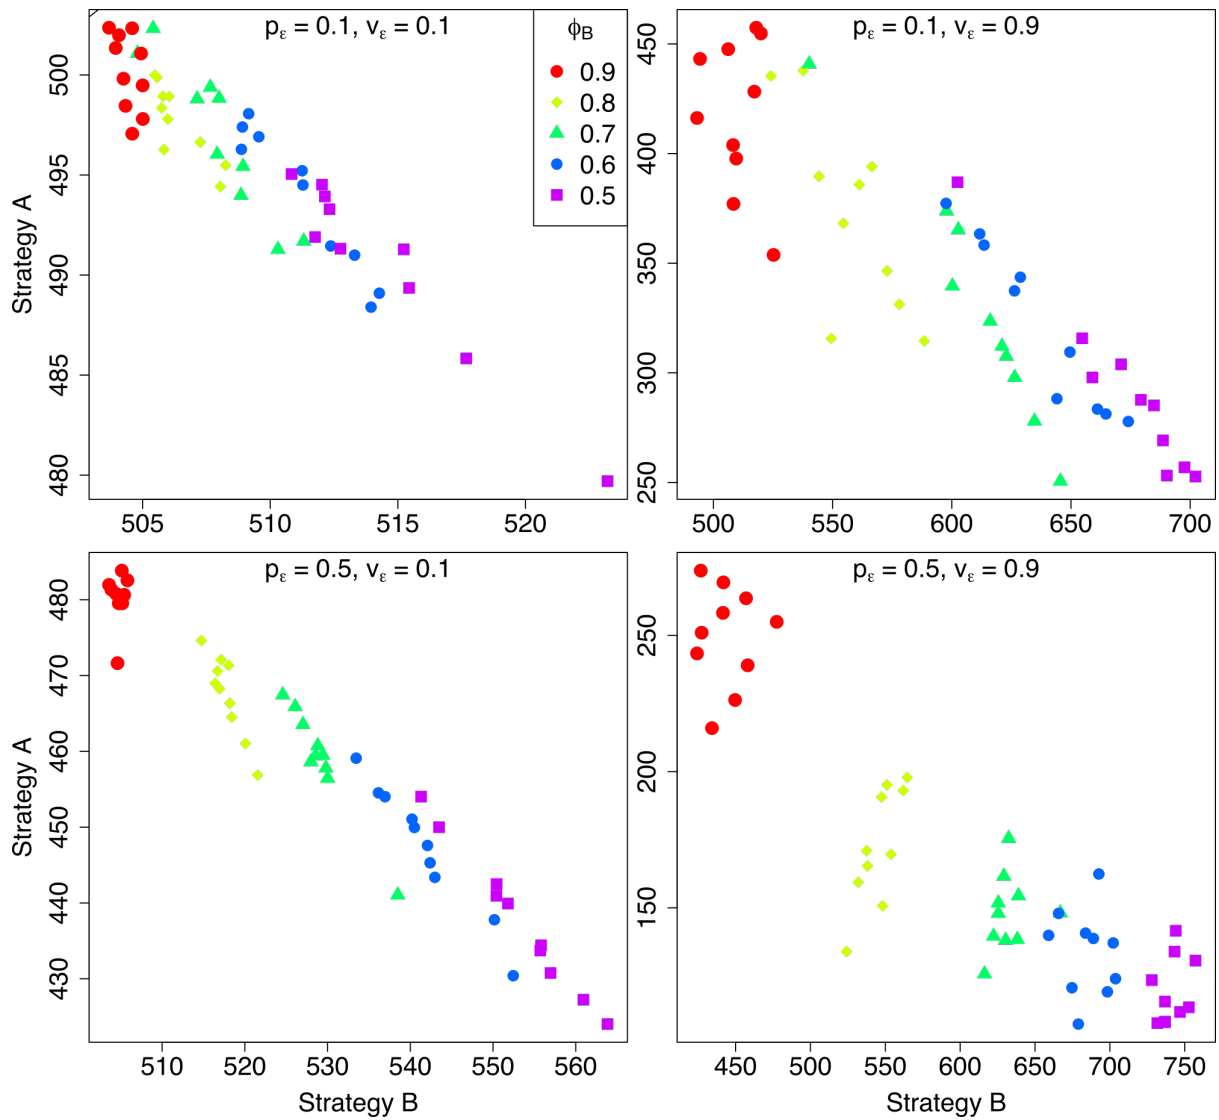

Figure S14: Obligate apomictic (strategy A) vs. obligate automictic parthenogenesis (strategy B). Axes represent the short-term temporal mean population sizes of competing strategies in the marginal habitat (North path). Note that  $\phi$  represents the relative difference in sensitivity to environmental stress between apomictic (strategy A;  $\phi^A = 1.0$ ) and automictic (strategy B;  $\phi^B$ ) parthenogenesis, or between parthenogenesis (strategy A;  $\phi^A = 1.0$ ) and sexual reproduction (strategy C;  $\phi^C$ ).

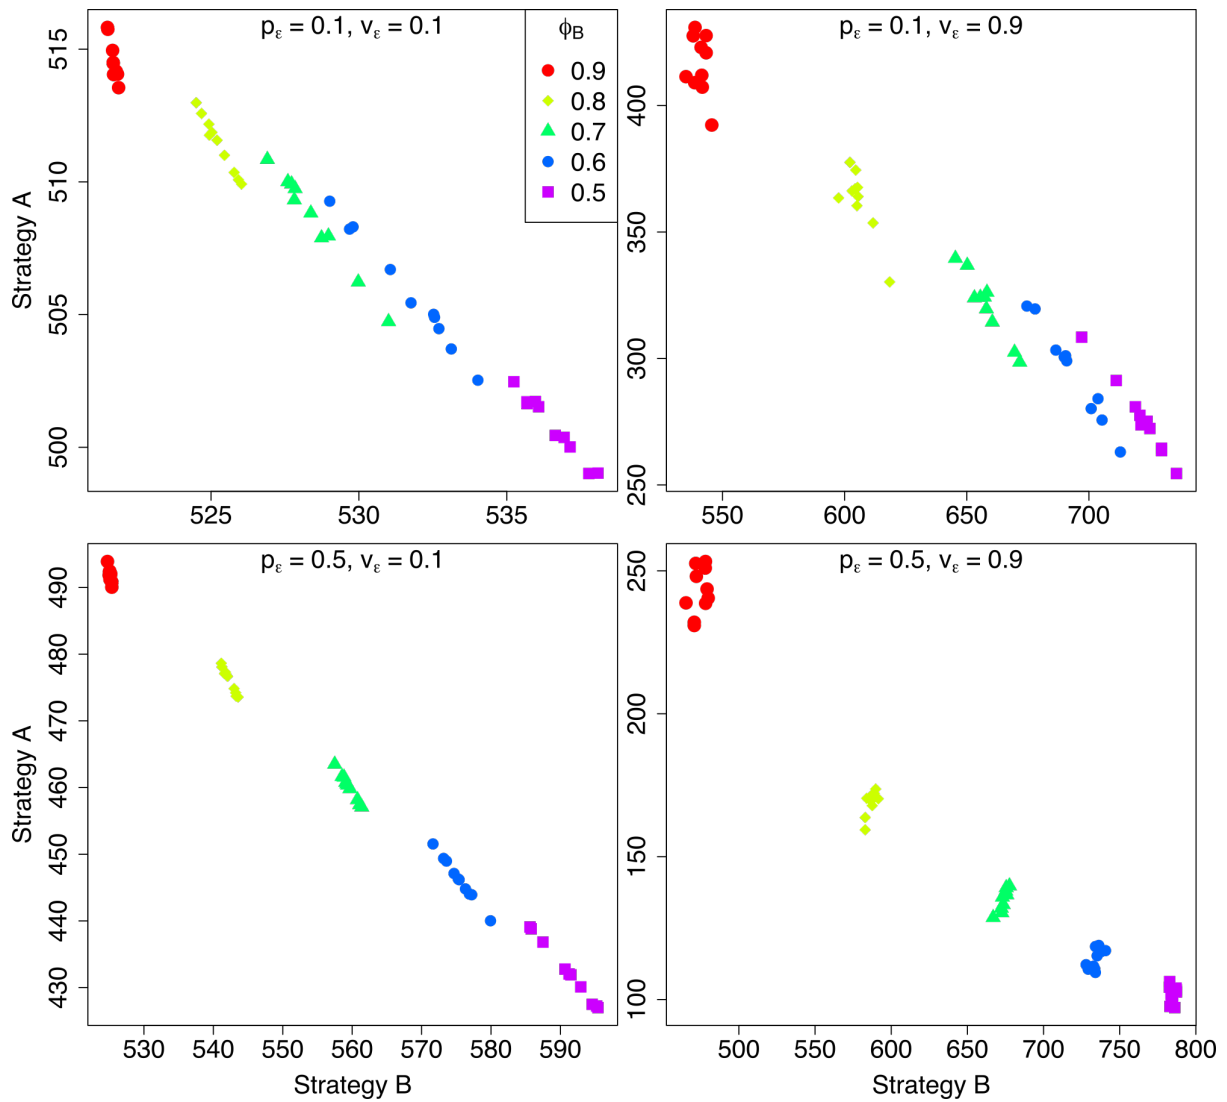

Figure S15: Obligate apomictic (strategy A) vs. obligate automictic parthenogenesis (strategy B). Axes represent the long-term temporal mean population sizes of competing strategies in the marginal habitat (North path). Note that  $\phi$  represents the relative difference in sensitivity to environmental stress between apomictic (strategy A;  $\phi^A = 1.0$ ) and automictic (strategy B;  $\phi^B$ ) parthenogenesis, or between parthenogenesis (strategy A;  $\phi^A = 1.0$ ) and sexual reproduction (strategy C;  $\phi^C$ ).

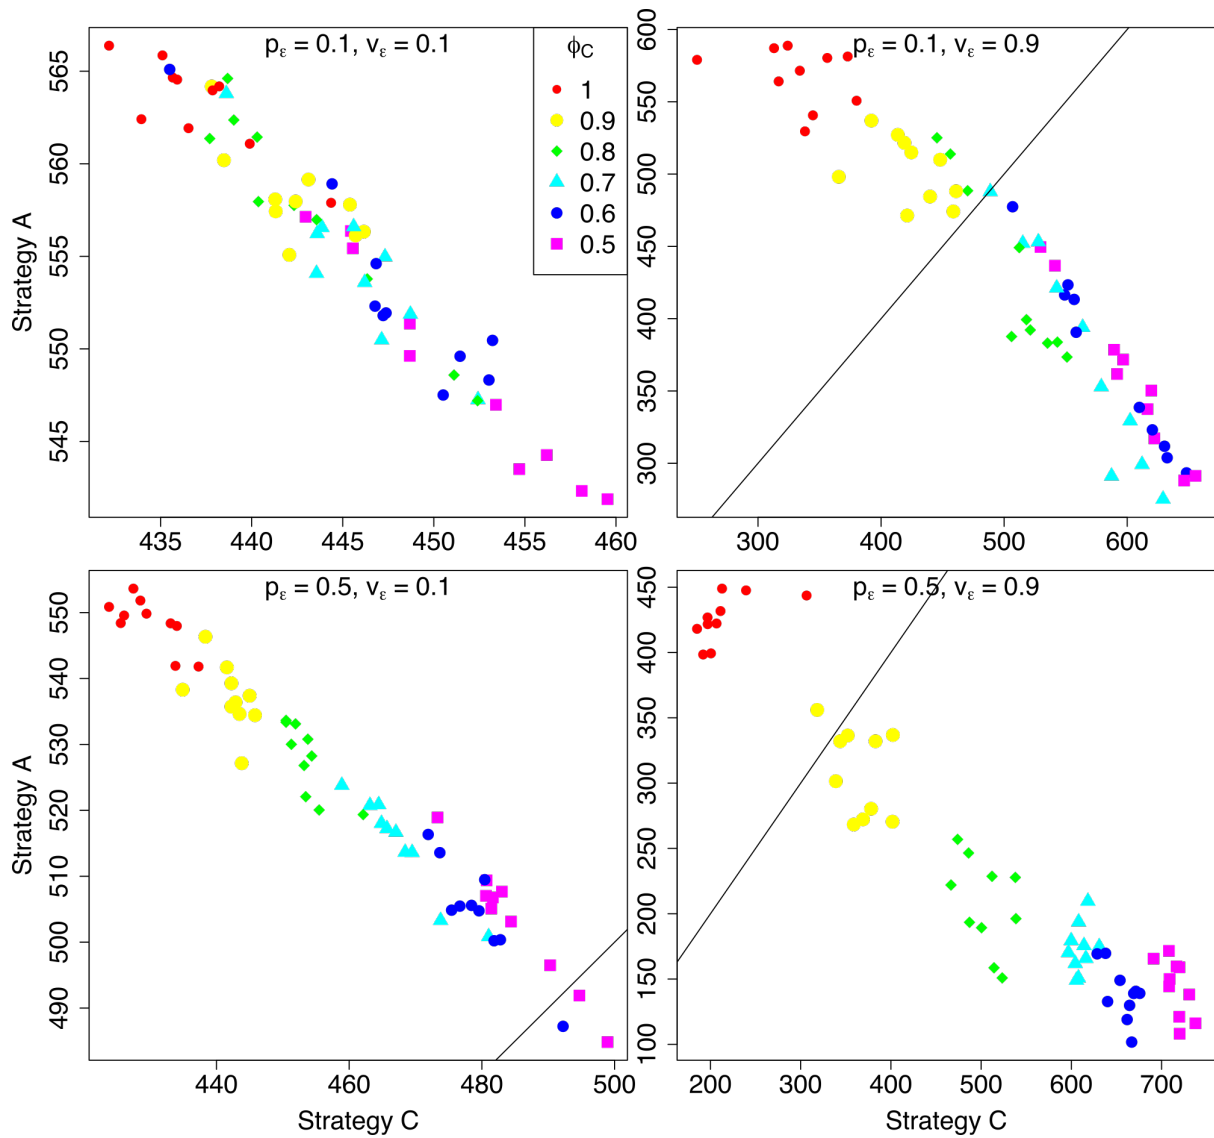

Figure S16: Obligate parthenogenesis (strategy A/B) vs. obligate sexual reproduction (strategy C). Axes represent the short-term temporal mean population sizes of competing strategies in the marginal habitat (North path) under a weak Allee effect ( $\alpha = 0.3$  and  $\beta = 0.1$ ). Note that  $\phi$  represents the relative difference in sensitivity to environmental stress between apomictic (strategy A;  $\phi^A = 1.0$ ) and automictic (strategy B;  $\phi^B$ ) parthenogenesis, or between parthenogenesis (strategy A;  $\phi^A = 1.0$ ) and sexual reproduction (strategy C;  $\phi^C$ ).

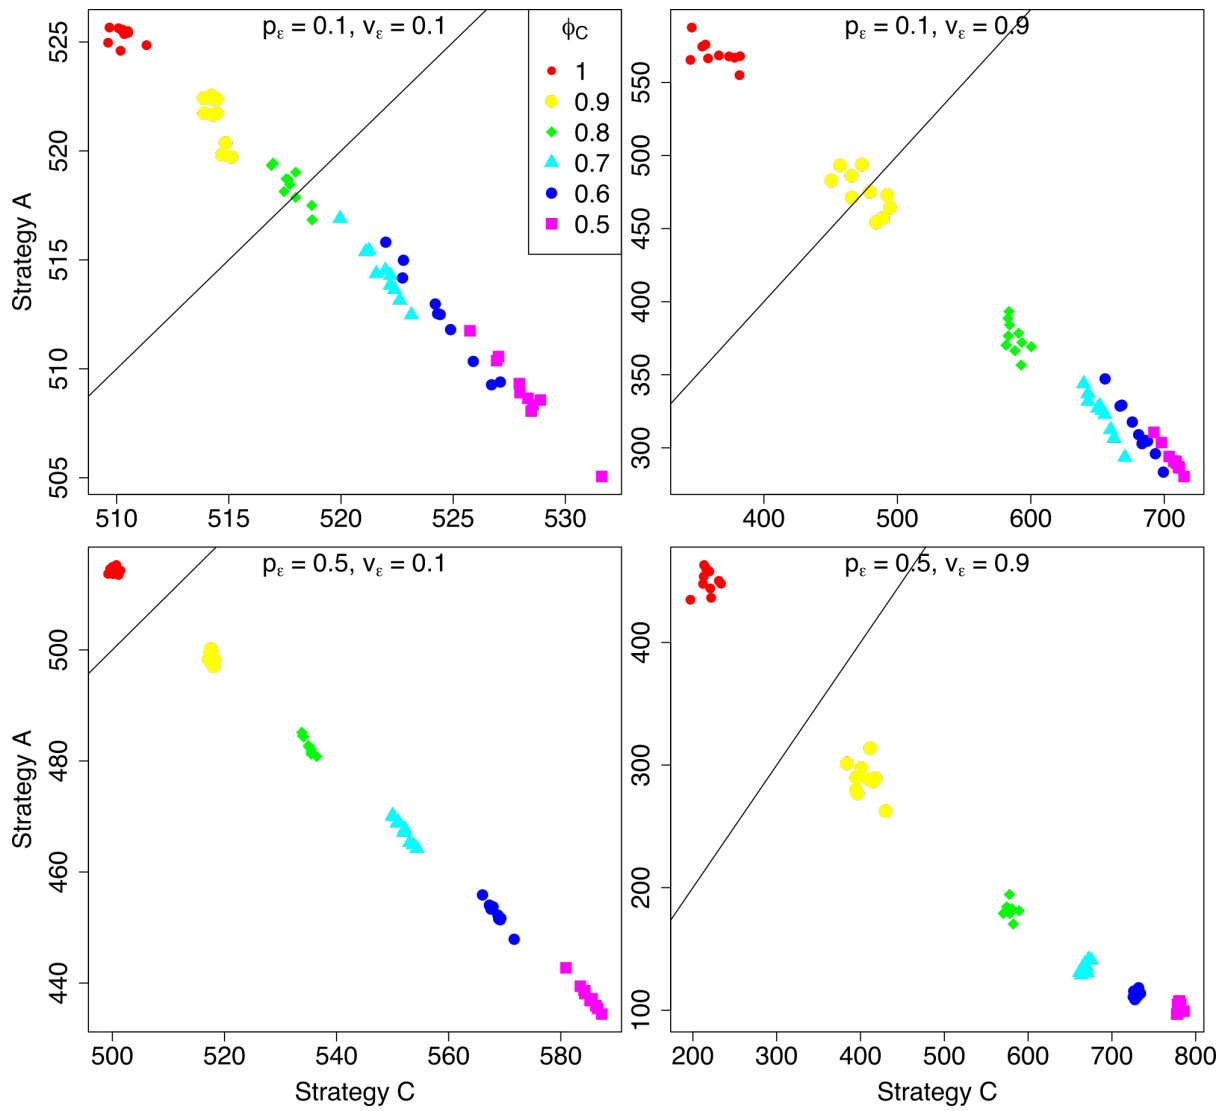

Figure S17: Obligate parthenogenesis (strategy A/B) vs. obligate sexual reproduction (strategy C). Axes represent the long-term temporal mean population sizes of competing strategies in the marginal habitat (North path) under a weak Allee effect ( $\alpha = 0.3$  and  $\beta = 0.1$ ). Note that  $\phi$  represents the relative difference in sensitivity to environmental stress between apomictic (strategy A;  $\phi^A = 1.0$ ) and automictic (strategy B;  $\phi^B$ ) parthenogenesis, or between parthenogenesis (strategy A;  $\phi^A = 1.0$ ) and sexual reproduction (strategy C;  $\phi^C$ ).

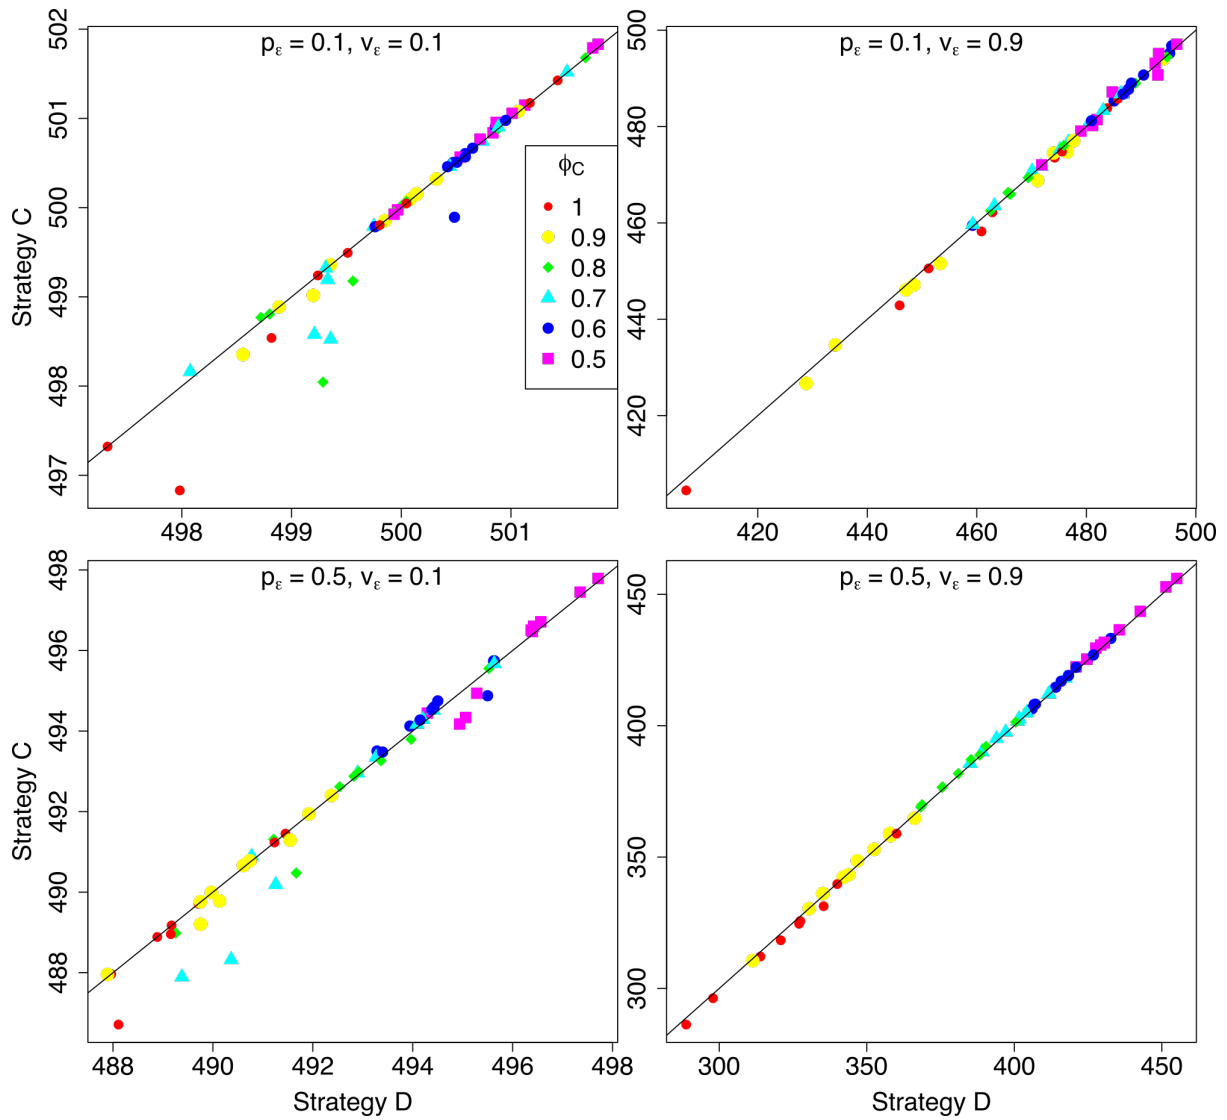

Figure S18: Obligate sexual reproduction (strategy C) vs. facultative parthenogenesis (strategy D/E). Axes represent the short-term temporal mean population sizes of competing strategies in the marginal habitat (North path) under a weak Allee effect ( $\alpha = 0.3$  and  $\beta = 0.1$ ). Note that  $\phi$  represents the relative difference in sensitivity to environmental stress between apomictic (strategy A;  $\phi^A = 1.0$ ) and automictic (strategy B;  $\phi^B$ ) parthenogenesis, or between parthenogenesis (strategy A;  $\phi^A = 1.0$ ) and sexual reproduction (strategy C;  $\phi^C$ ).

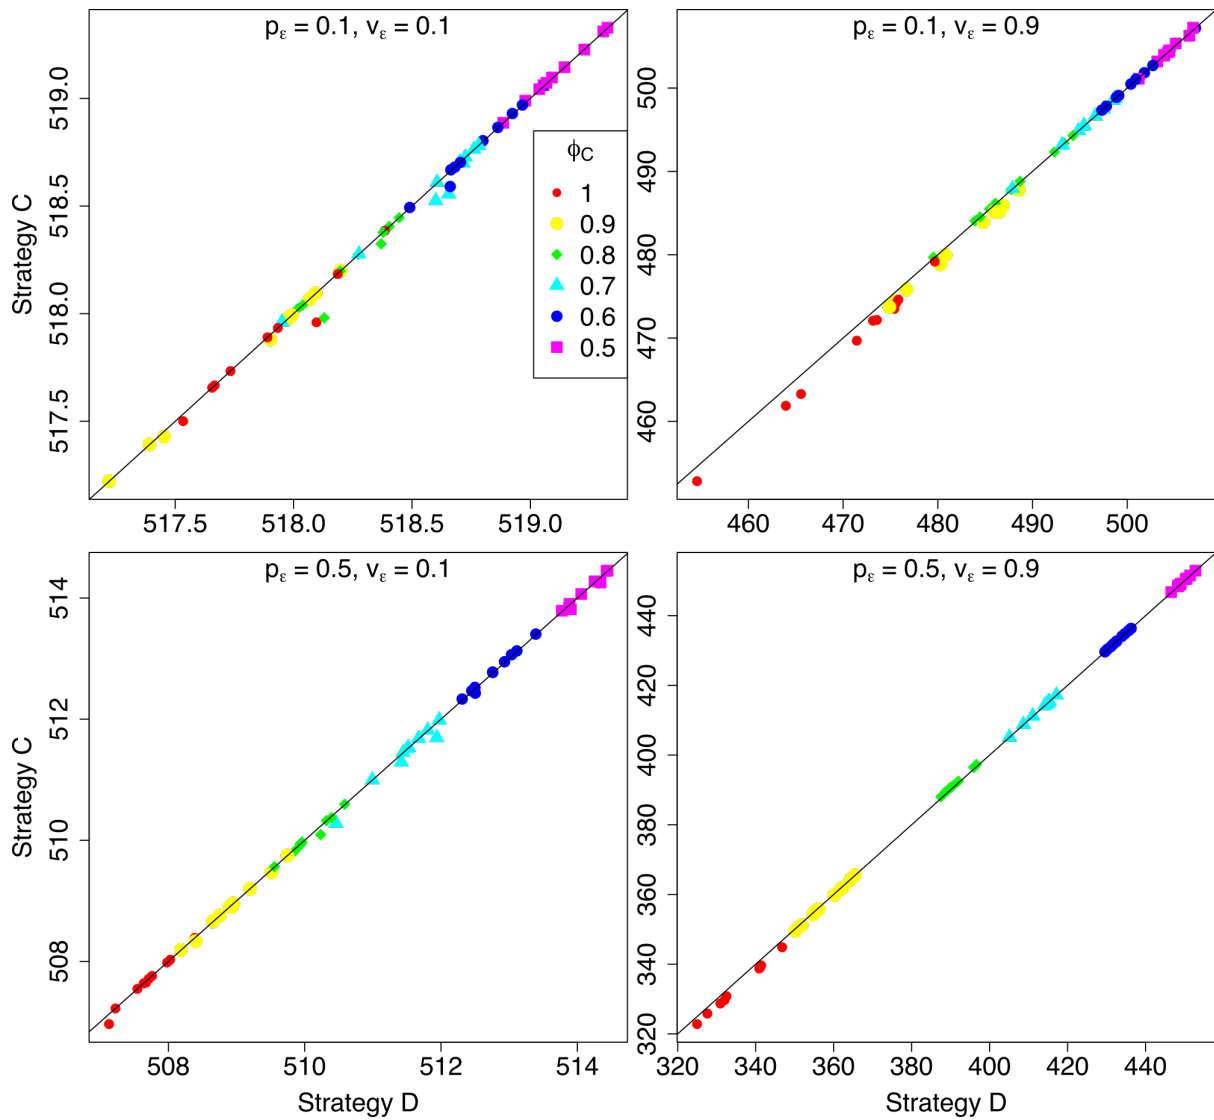

Figure S19: Obligate sexual reproduction (strategy C) vs. facultative parthenogenesis (strategy D/E). Axes represent the long-term temporal mean population sizes of competing strategies in the marginal habitat (North path) under a weak Allee effect ( $\alpha = 0.3$  and  $\beta = 0.1$ ). Note that  $\phi$  represents the relative difference in sensitivity to environmental stress between apomictic (strategy A;  $\phi^A = 1.0$ ) and automictic (strategy B;  $\phi^B$ ) parthenogenesis, or between parthenogenesis (strategy A;  $\phi^A = 1.0$ ) and sexual reproduction (strategy C;  $\phi^C$ ).



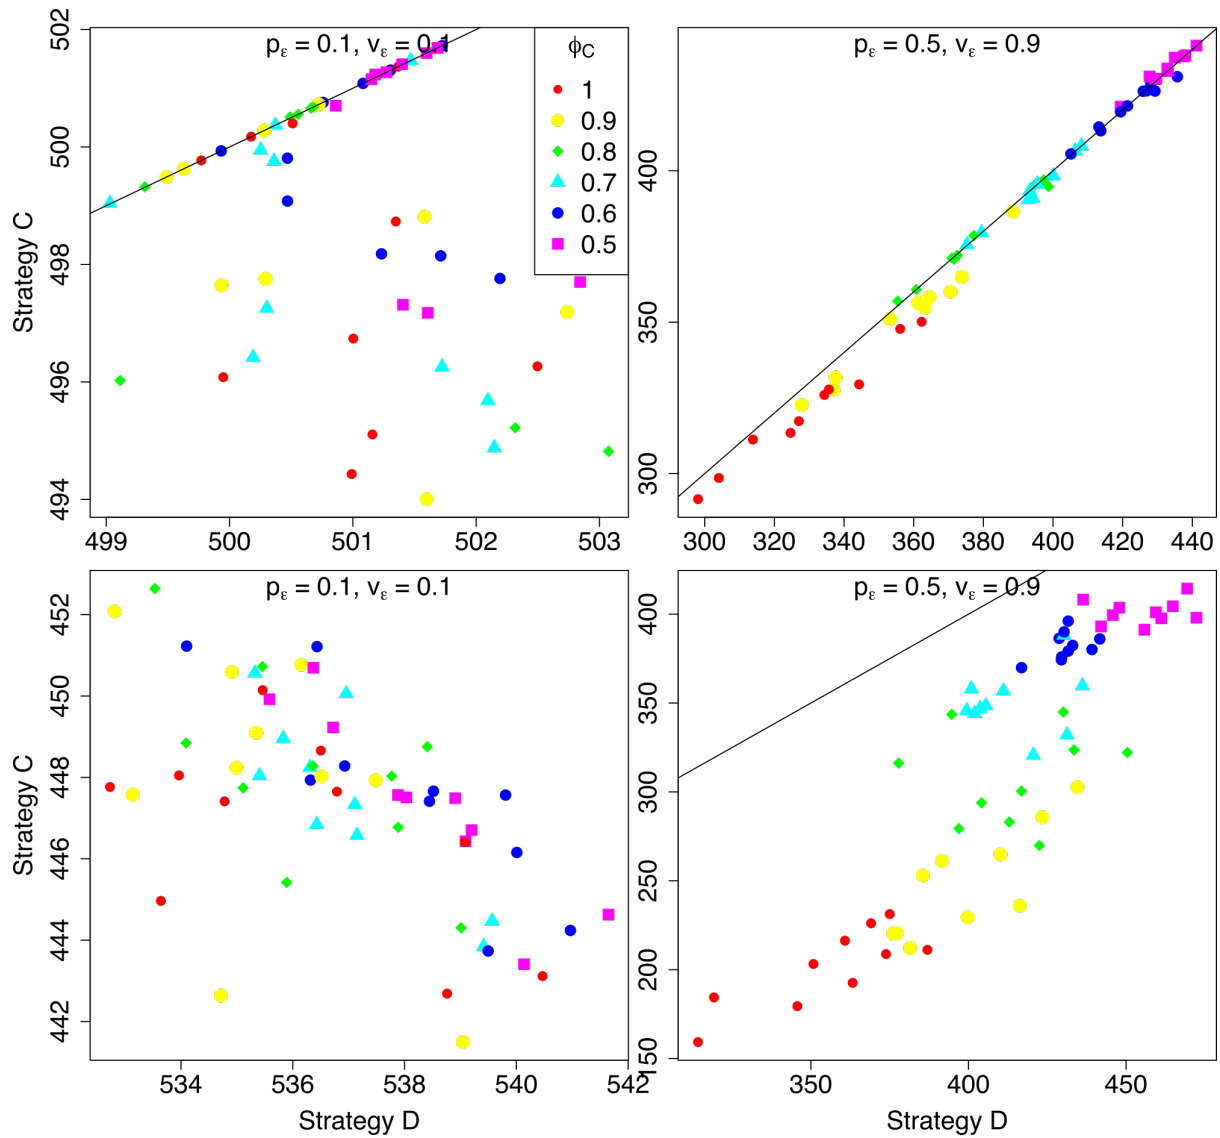

Figure S20: Obligate sexual reproduction (strategy C) vs. facultative parthenogenesis (strategy D/E). Axes represent the short-term temporal mean population sizes of competing strategies in the marginal habitat (North path) under a weak Allee effect (top row;  $\alpha = 0.3$  and  $\beta = 0.1$ ) and a strong Allee effect (bottom row;  $\alpha = 0.1$  and  $\beta = 0.3$ ), with a high transition rate ( $\tau = 0.8$ ). Note that  $\phi$  represents the relative difference in sensitivity to environmental stress between apomictic (strategy A;  $\phi^A = 1.0$ ) and automictic (strategy B;  $\phi^B$ ) parthenogenesis, or between parthenogenesis (strategy A;  $\phi^A = 1.0$ ) and sexual reproduction (strategy C;  $\phi^C$ ). high transition rate ( $\tau = 0.8$ ).

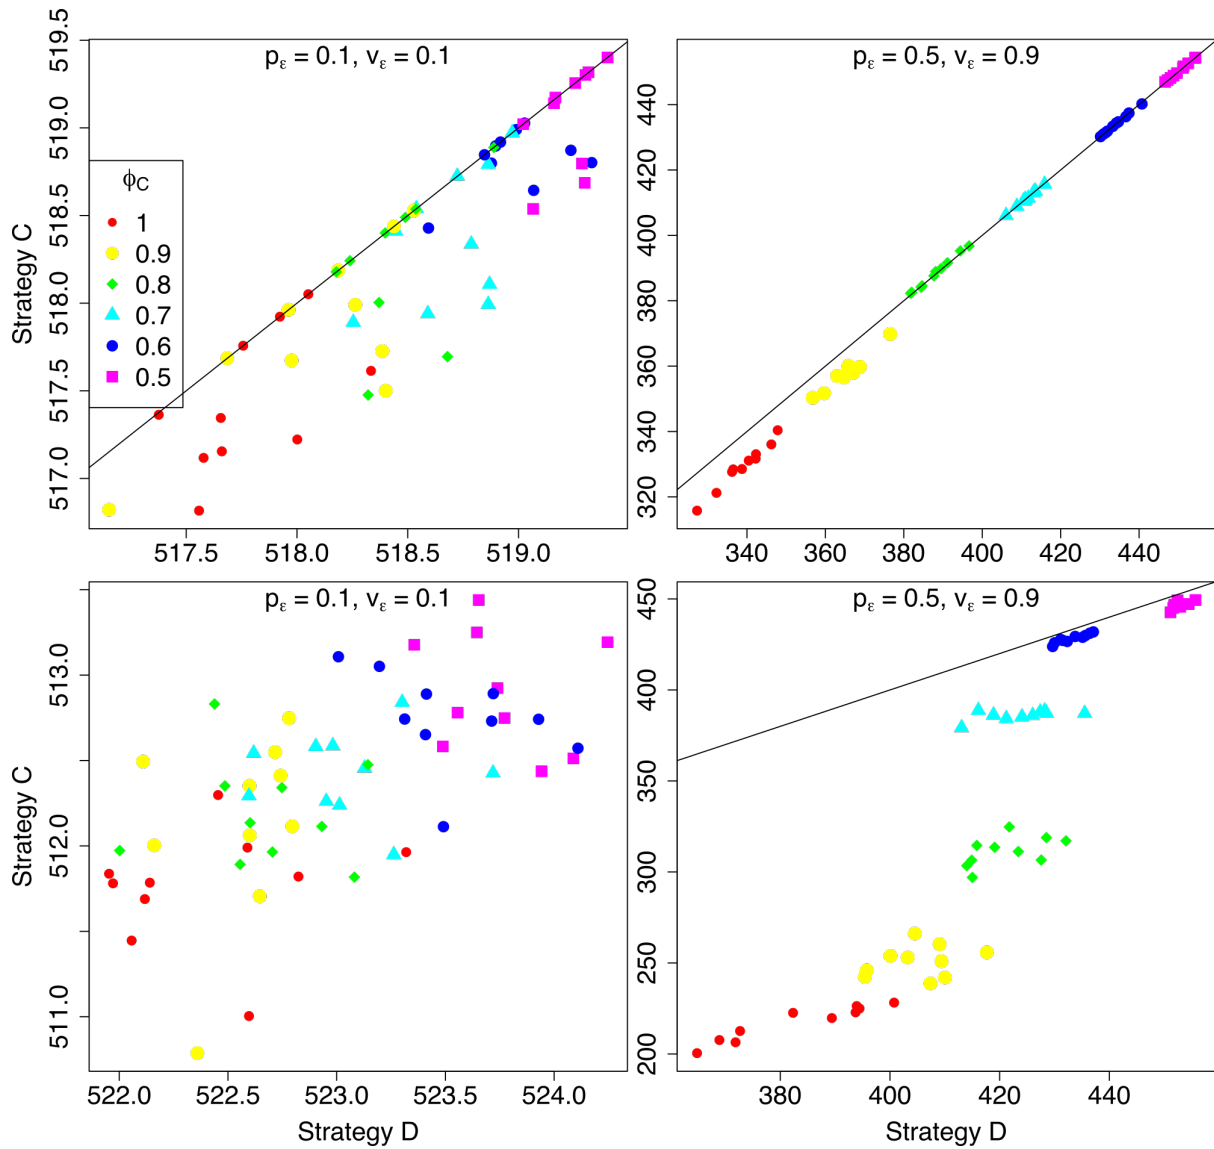

Figure S21: Obligate sexual reproduction (strategy C) vs. facultative parthenogenesis (strategy D/E). Axes represent the long-term temporal mean population sizes of competing strategies in the marginal habitat (North path) under a weak Allee effect (top row;  $\alpha = 0.3$  and  $\beta = 0.1$ ) and a strong Allee effect (bottom row;  $\alpha = 0.1$  and  $\beta = 0.3$ ), with a high transition rate ( $\tau = 0.8$ ). Note that  $\phi$  represents the relative difference in sensitivity to environmental stress between apomictic (strategy A;  $\phi^A = 1.0$ ) and automictic (strategy B;  $\phi^B$ ) parthenogenesis, or between parthenogenesis (strategy A;  $\phi^A = 1.0$ ) and sexual reproduction (strategy C;  $\phi^C$ ). high transition rate ( $\tau = 0.8$ ).

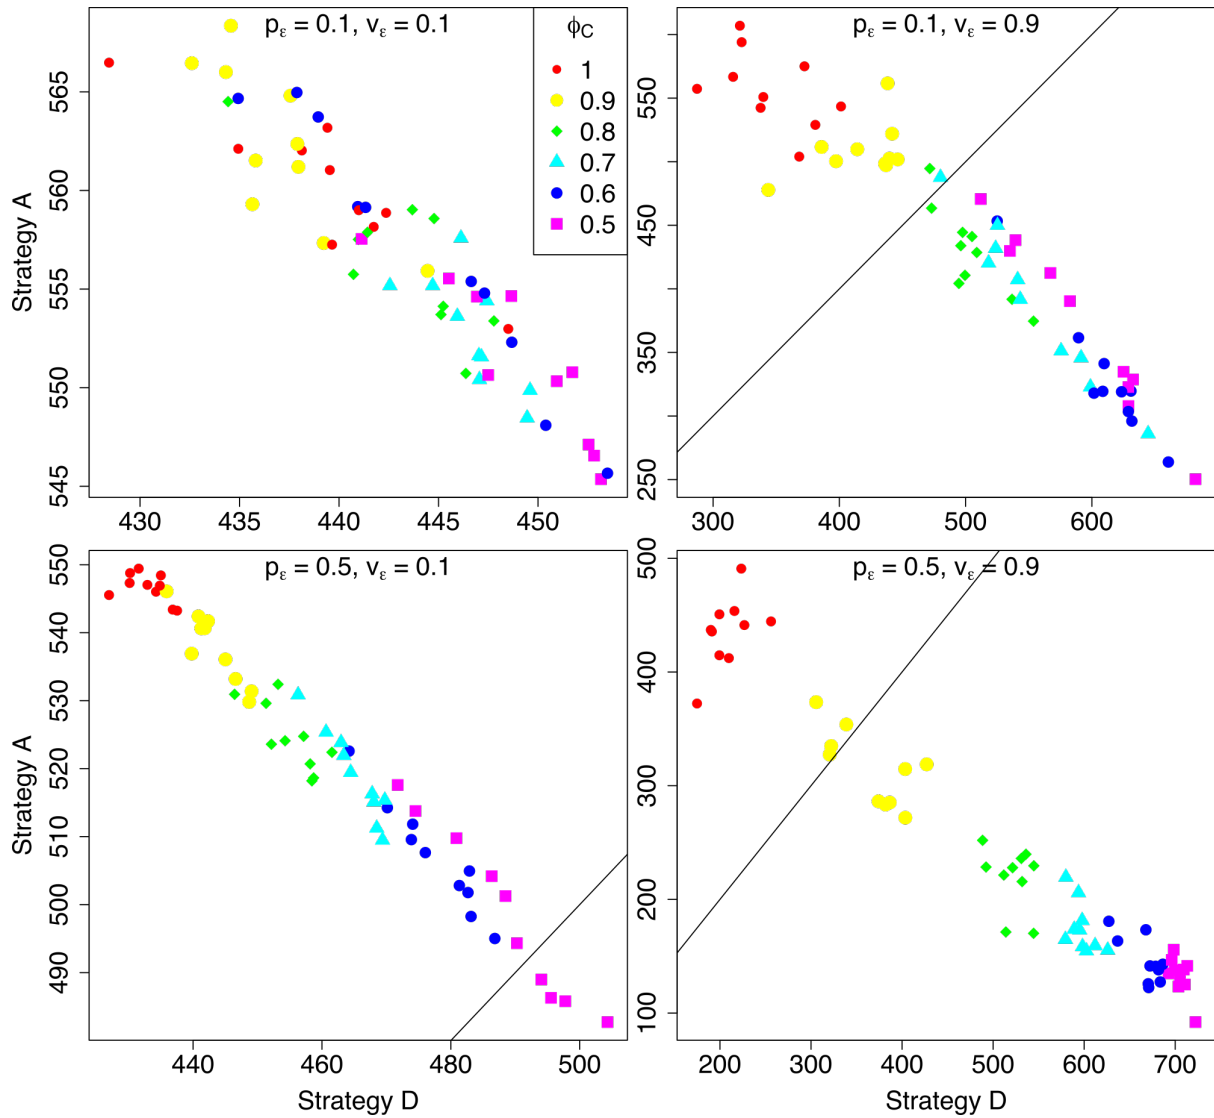

Figure S22: Obligate parthenogenesis (strategy A/B) vs. facultative parthenogenesis (strategy D/E). Axes represent the short-term temporal mean population sizes of competing strategies in the marginal habitat (North path) under a weak Allee effect ( $\alpha = 0.3$  and  $\beta = 0.1$ ). Note that  $\phi$  represents the relative difference in sensitivity to environmental stress between apomictic (strategy A;  $\phi^A = 1.0$ ) and automictic (strategy B;  $\phi^B$ ) parthenogenesis, or between parthenogenesis (strategy A;  $\phi^A = 1.0$ ) and sexual reproduction (strategy C;  $\phi^C$ ).

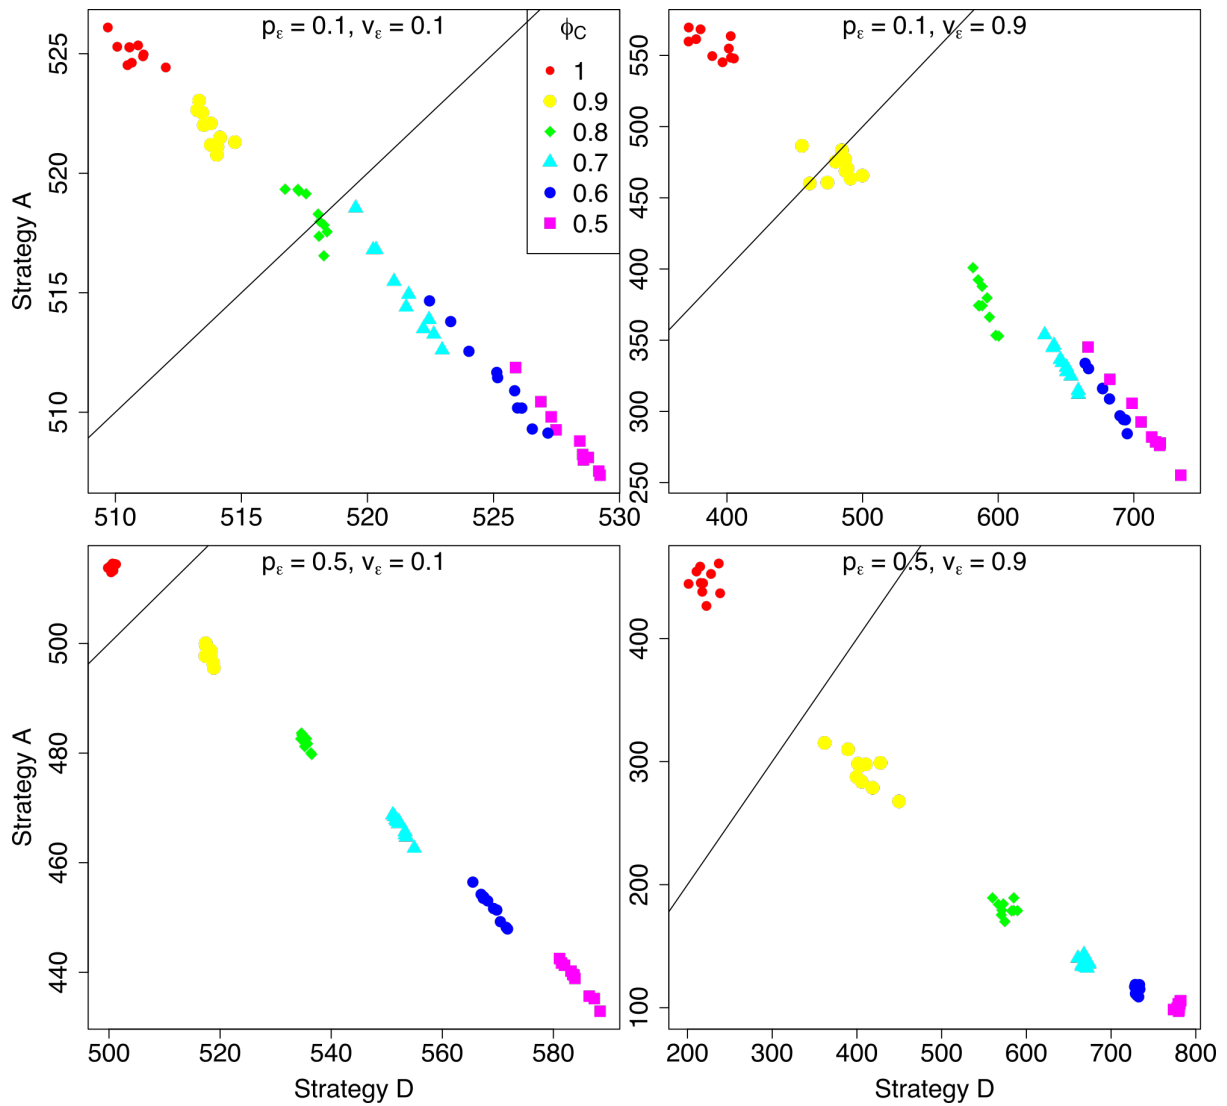

Figure S23: Obligate parthenogenesis (strategy A/B) vs. facultative parthenogenesis (strategy D/E). Axes represent the long-term temporal mean population sizes of competing strategies in the marginal habitat (North path) under a weak Allee effect ( $\alpha = 0.3$  and  $\beta = 0.1$ ). Note that  $\phi$  represents the relative difference in sensitivity to environmental stress between apomictic (strategy A;  $\phi^A = 1.0$ ) and automictic (strategy B;  $\phi^B$ ) parthenogenesis, or between parthenogenesis (strategy A;  $\phi^A = 1.0$ ) and sexual reproduction (strategy C;  $\phi^C$ ).

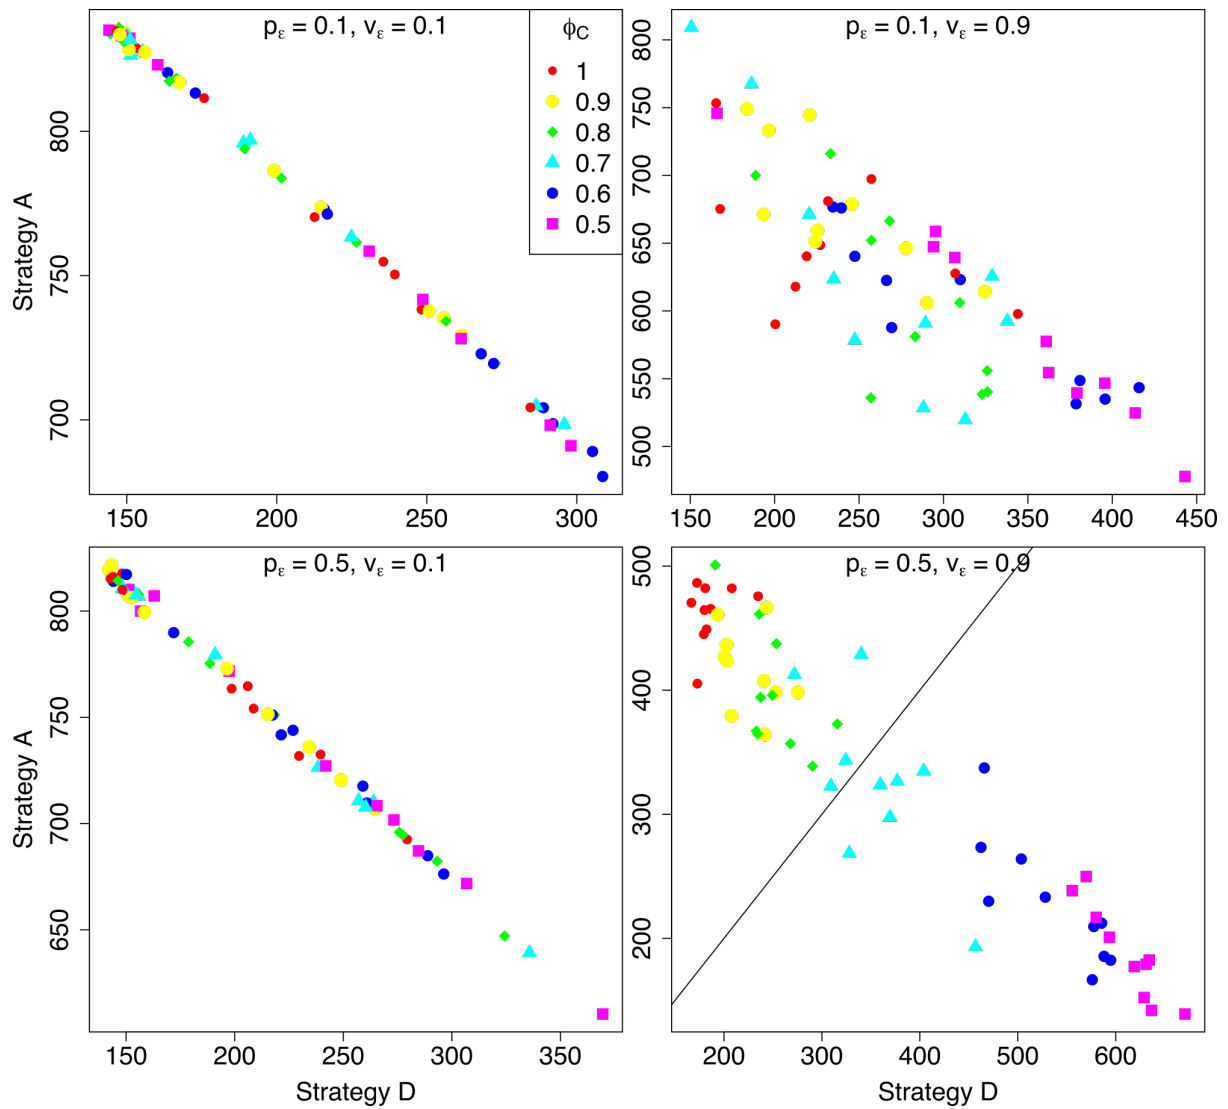

Figure S24: Obligate parthenogenesis (strategy A/B) vs. facultative parthenogenesis (strategy D/E). Axes represent the short-term temporal mean population sizes of competing strategies in the marginal habitat (North path) under a strong Allee effect ( $\alpha = 0.1$  and  $\beta = 0.3$ ). Note that  $\phi$  represents the relative difference in sensitivity to environmental stress between apomictic (strategy A;  $\phi^A = 1.0$ ) and automictic (strategy B;  $\phi^B$ ) parthenogenesis, or between parthenogenesis (strategy A;  $\phi^A = 1.0$ ) and sexual reproduction (strategy C;  $\phi^C$ ).

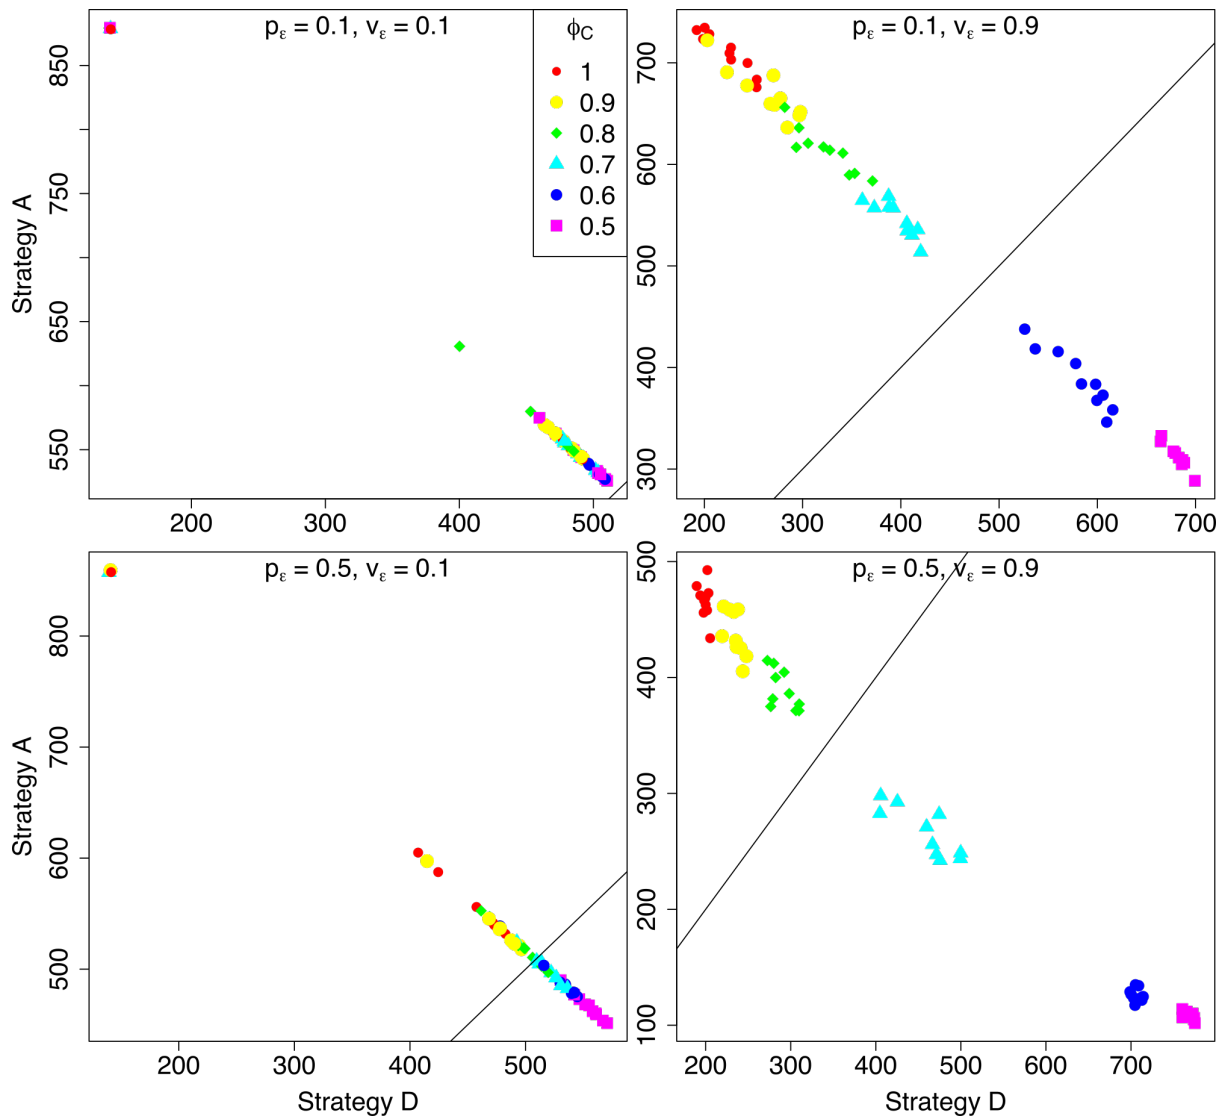

Figure S25: Obligate parthenogenesis (strategy A/B) vs. facultative parthenogenesis (strategy D/E). Axes represent the long-term temporal mean population sizes of competing strategies in the marginal habitat (North path) under a strong Allee effect ( $\alpha = 0.1$  and  $\beta = 0.3$ ). Note that  $\phi$  represents the relative difference in sensitivity to environmental stress between apomictic (strategy A;  $\phi^A = 1.0$ ) and automictic (strategy B;  $\phi^B$ ) parthenogenesis, or between parthenogenesis (strategy A;  $\phi^A = 1.0$ ) and sexual reproduction (strategy C;  $\phi^C$ ).
